# Supplementary material
Source: PubMed Central journal article supplement (PMC3853347)
Supplement: NIHMS500267-supplement-1.pdf [file NIHMS500267-supplement-1.pdf]

## **Supplementary Information**

### **Title**

Top3 $\beta$  is an RNA topoisomerase that works with Fragile X syndrome protein to promote synapse formation

### **Authors**

Dongyi Xu, Weiping Shen, Rong Guo, Yutong Xue, Wei Peng, Jian Sima, Jay Yang, Alexei Sharov, Subramanya Srikantan, Jiandong Yang, David Fox, 3rd, Yong Qian, Jennifer L. Martindale, Yulan Piao, James Machamer, Samit R. Joshi, Subhasis Mohanty, Albert C. Shaw, Thomas E. Lloyd, Grant W. Brown, Minoru S.H. Ko, Myriam Gorospe, Sige Zou, Weidong Wang.

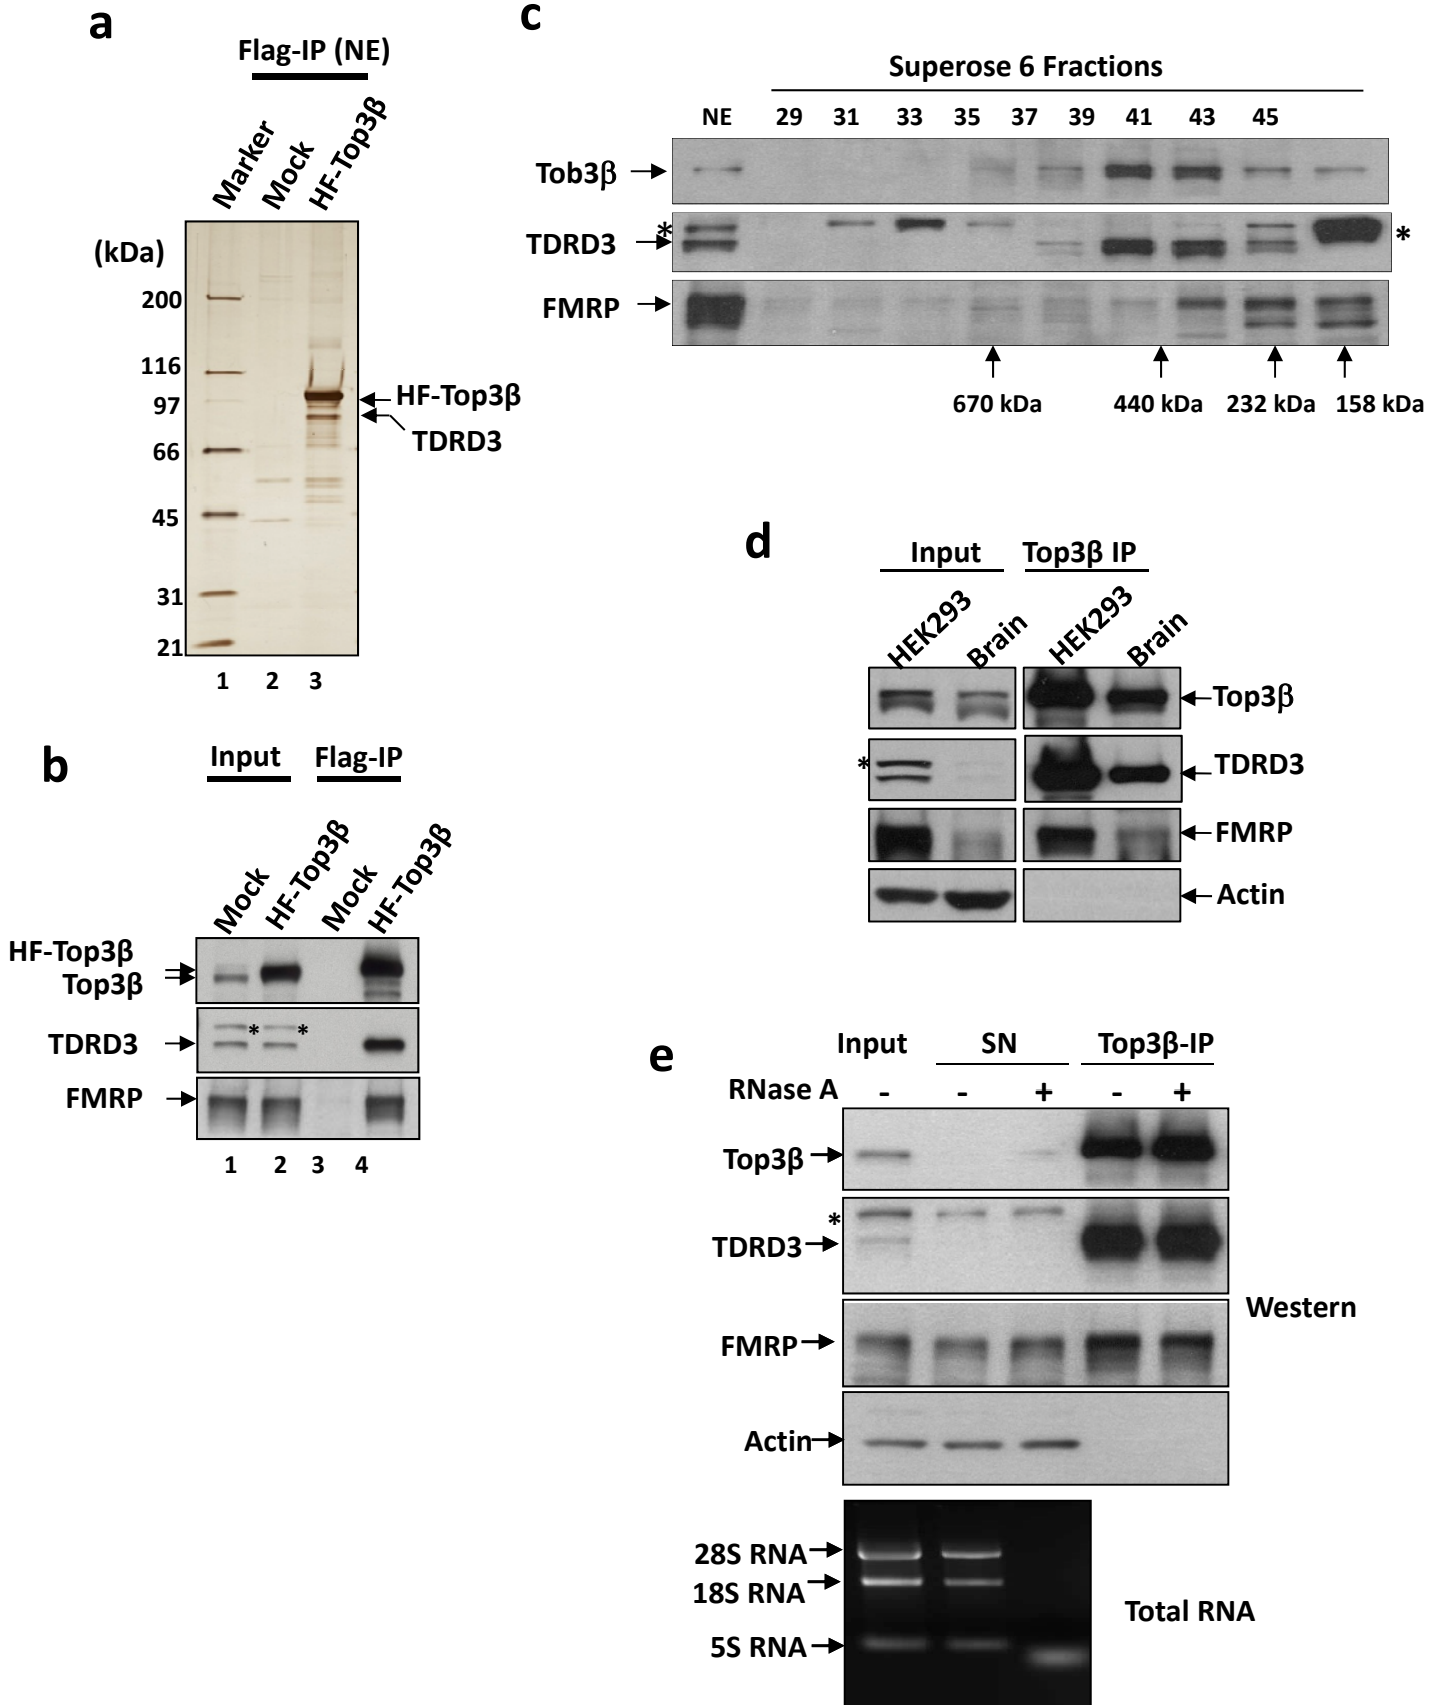

**Supplementary Figure 1. Top3 $\beta$  and TDRD3 form a complex that associates with FMRP in the presence or absence of RNA.** (a,b) A silver-stained SDS gel (a) and immunoblotting (b) show that 6-histidine and Flag double-tagged Top3 $\beta$  (HF-Top3 $\beta$ ) coimmunoprecipitated with TDRD3 and FMRP from HeLa nuclear extract. The major polypeptides were identified by mass spectrometry. As a control, mock IP (Mock) was performed by using regular HeLa cells that do not express HF-Top3 $\beta$ . IP was performed using a Flag antibody. (c) Immunoblotting shows that the Superose 6 fractionation profile of the Top3 $\beta$ -TDRD3 complex overlaps with that of FMRP in HeLa nuclear extract. The fractions corresponding to molecular weight standards are indicated at the bottom. The asterisks mark a crossreactive polypeptide. The peak fraction of Top3 $\beta$  is co-incidental with that of TDRD3 (fractions 39 and 41), consistent with the notion that the two proteins fractionate as a complex. However, this peak only partially overlaps with that of FMRP (fractions 41-43), suggesting that only a fraction of Top3 $\beta$ -TDRD3 complex associates with FMRP and vice versa. (d) IP-Western shows that Top3 $\beta$  co-immunoprecipitated with TDRD3 and FMRP from whole cell extracts of mouse brain. Human HEK293 cell extracts were included as a positive control. An asterisk marks a crossreactive polypeptide. (e) Top: IP-Western shows that TDRD3 and FMRP coimmunoprecipitate with Top3 $\beta$  in whole cell extract untreated or treated with RNase A (0.1 mg/ml). RNase-out (0.4 unit/ml) was added to the untreated extract to inhibit RNA degradation by endogenous RNases. Bottom: an ethidium bromide-stained agarose gel shows that RNase A treatment eliminates 28S, 18S and 5S rRNAs (top) in the supernatant (SN) after immunoprecipitation.

**a**

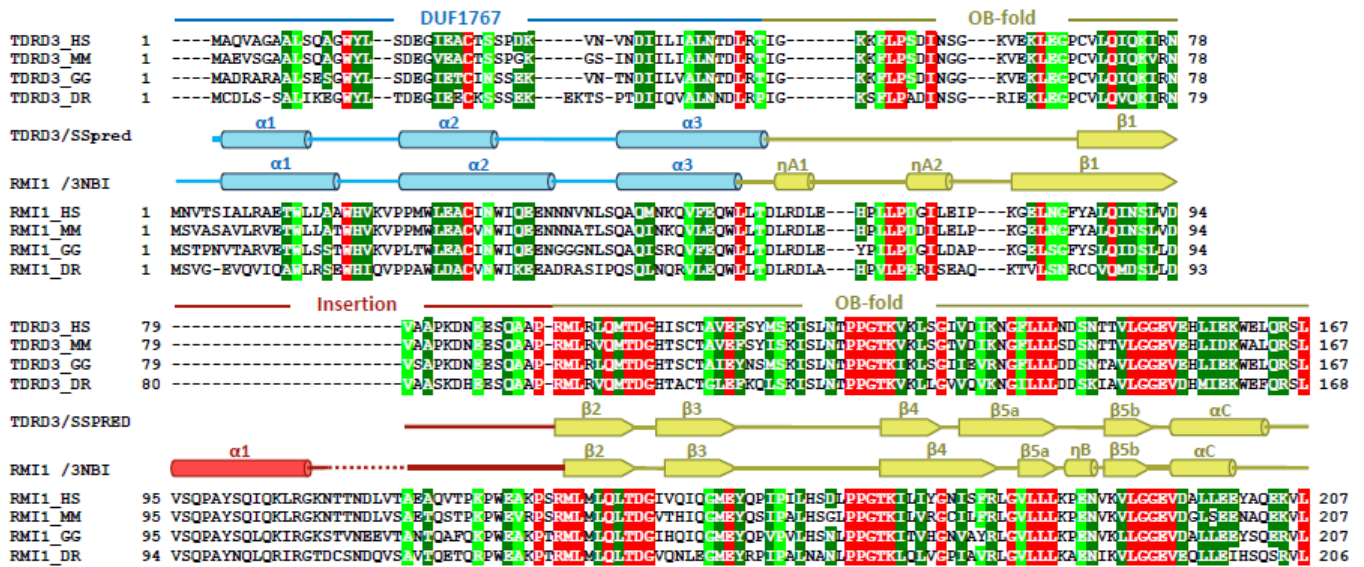

**b**

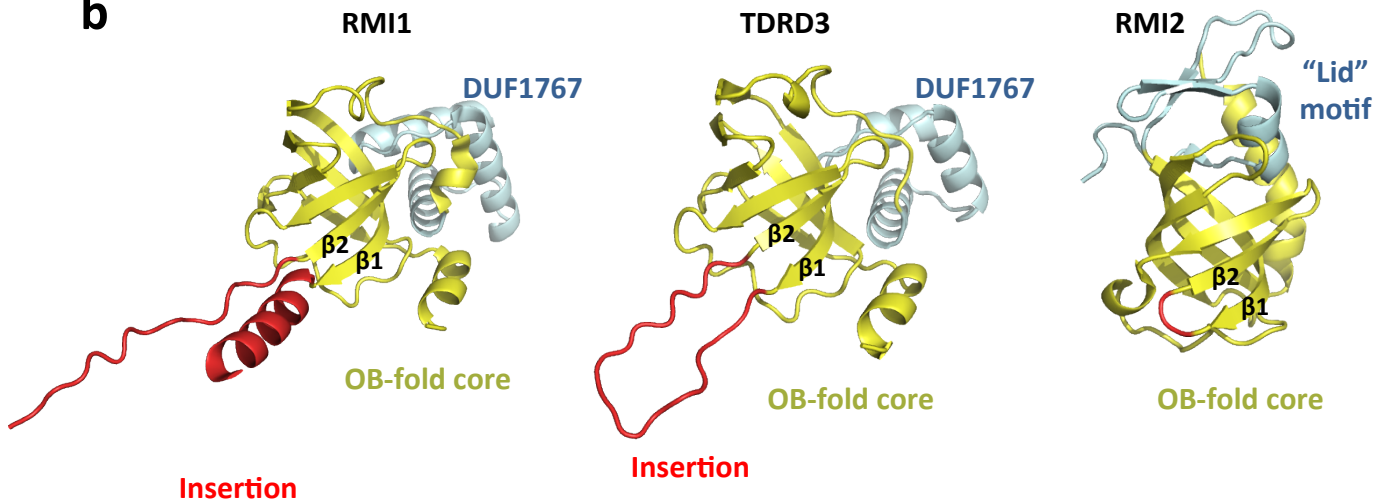

**Supplementary Figure 2. The N-terminal regions of TDRD3 and RMI1 have the same domains, including an OB-fold with a unique intervening region.** (a) Multiple sequence alignment with secondary and tertiary structure prediction for TDRD3 N-terminal region. The protein and their species are: TDRD3 and RMI1 from human (HS; Q9H7E2 [TDRD3], Q9H9A7 [RMI1]), mouse (MM; Q91W18 [TDRD3], Q10160 [RMI1]), chicken (GG; Q5ZMS6 [TDRD3], Q5ZHV8 [RMI1]) and fish (DR; Q6NYG6 [TDRD3], Q7ZVM9 [RMI1]) N-terminal sequences were aligned using Clustal-W with manual adjustments for secondary structure. Conservation between TDRD3 and RMI1 is indicated as follows: Red – identical residues; dark green – strong group semi-conserved; light green – weak group semi-conserved. RMI1 secondary structure was derived from the deposited pdb file (3NBI). TDRD3 secondary structure was predicted with PredictProtein and Phyre servers, and is shown above the RMI1 secondary structure for comparison. DUF1767 (blue) and OB-fold (yellow) domains for RMI1 and TDRD3 are shown above the alignment. The helix/loop insertion between  $\beta$ 1- $\beta$ 2 in the RMI1 OB-fold, which is required for interaction with Top3 $\alpha$ , is shown in red. TDRD3 is predicted to contain a shorter and unstructured loop, also shown in red, inserted at the same position as in RMI1. Dashes indicate missing residues in the RMI1 crystal structure. (b) Structural comparison of OB-fold loop insertions. Left, the RMI1 crystal structure (3NBI); Center, a TDRD3 homology model based on the RMI1 crystal structure (3NBI) and the structure-based alignment in S2a and generated using the alignment mode in SWISS-MODEL; Right, the RMI2 crystal structure (3NBH). The DUF1767, OB-fold, and loop insertions are colored as in (a). RMI2 is shown as comparison for an OB-fold lacking an insertion between strands  $\beta$ 1- $\beta$ 2. Dashes indicated missing residues in the RMI1 crystal structure. Structures were visualized using the PyMol software package v0.99 .

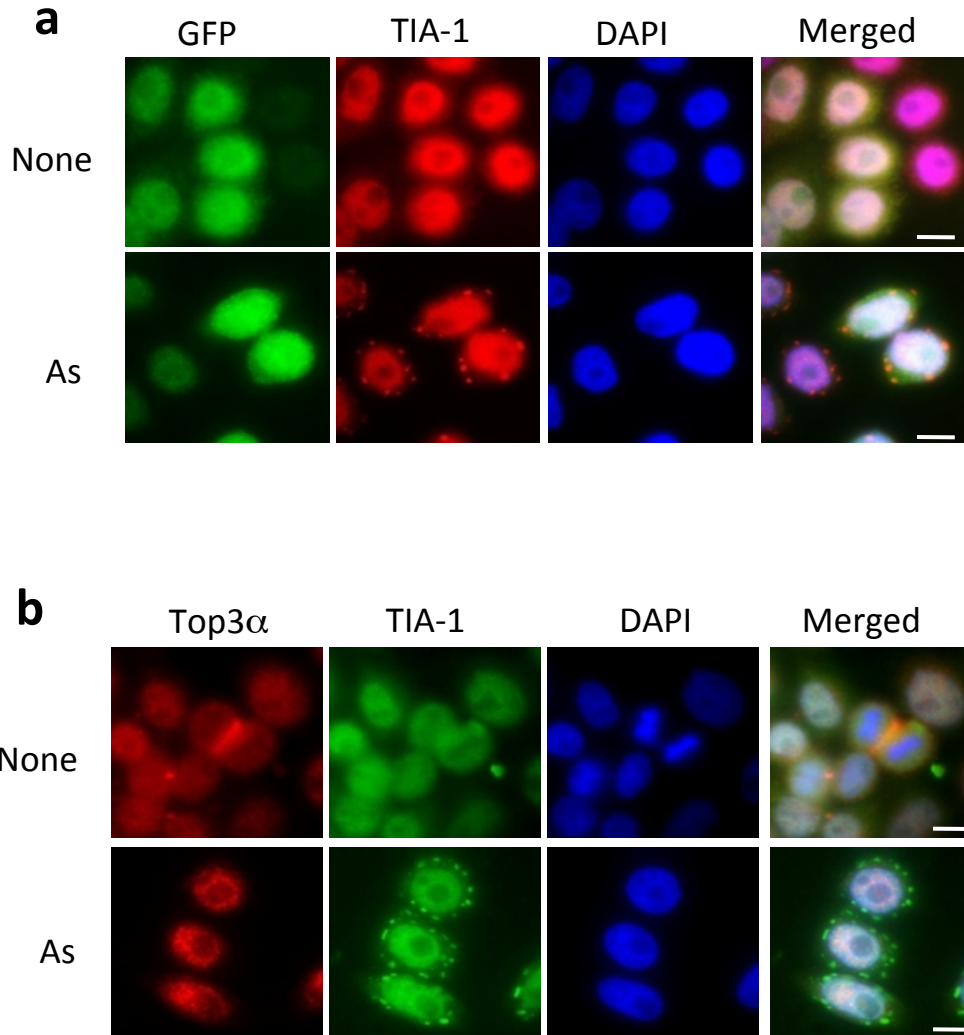

**Supplementary Figure 3. GFP and Top3a do not localize in RNA stress granules. (a, b)**

Immunofluorescence shows that GFP (a) and Top3 $\alpha$  (b) are not localized in RNA stress granules in HeLa cells induced by arsenite (As). TIA-1 is a marker for stress granules, and the nucleus is stained with DAPI. The scale bars are 100  $\mu$ m.

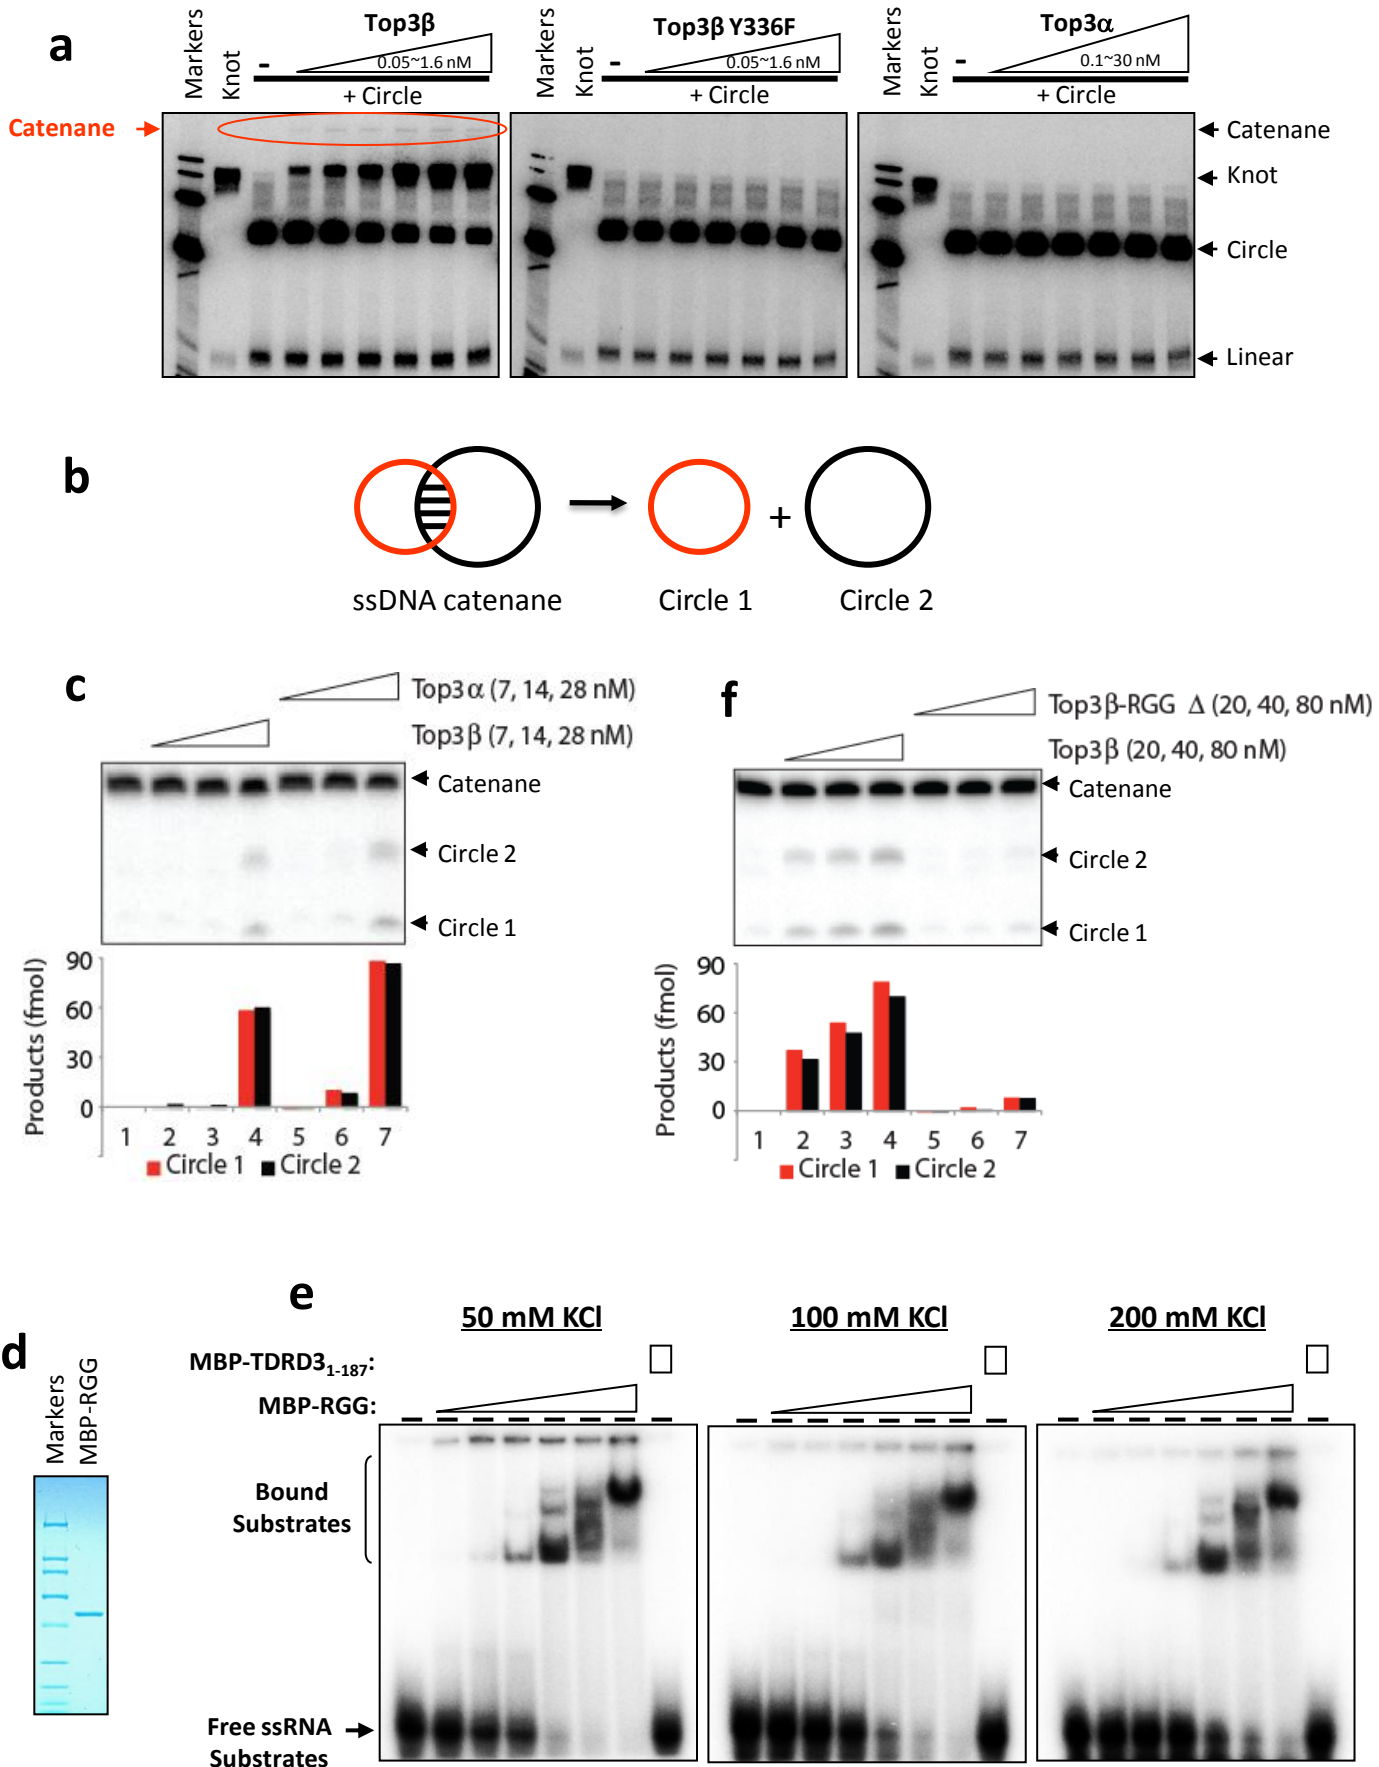

**Supplementary Figure 4. The Top3 $\beta$ –catalyzed RNA topoisomerase reaction produces a small amount of catenane; the RGG domain of Top3 $\beta$  binds RNA at different salt concentrations; the RGG domain of Top3 $\beta$  is important for its ssDNA decatenase activity.** (a) PhosphorImager analyses at long exposure to show that the RNA catenane products are produced by Top3 $\beta$  wildtype protein, but not by its catalytic inactive mutant Y336F or Top3 $\alpha$ . The catenane products are highlighted by a red ellipse. The light exposure version is shown in Figure 4C. (b) Schematic representation of the single-stranded DNA (ssDNA) decatenase assay. (c) ssDNA decatenase assay (top panel) and its quantification (bottom panel) show that Top3 $\alpha$  and Top3 $\beta$  have similar ssDNA decatenase activity. (d) A Coomassie blue stained SDS gel shows the purified fusion protein containing maltose-binding protein and the RGG domain of Top3 $\beta$  (MBP-RGG). (e) Gel-shift assays to show that MBP-RGG binds a single-stranded RNA substrate at different salt concentrations as indicated above each image. Reaction contains 1 nM single-stranded RNA and 62.5 nM, 125 nM, 250 nM, 500 nM, 1000 nM and 2000 nM MBP-RGG protein under different salt conditions as indicated. A different MBP-fusion protein containing the OB-fold domain of TDRD3 (MBP-TDRD<sub>31-187</sub>; 2000 nM) was included as a negative control. (f) ssDNA decatenase assay (top panel) and its quantification (bottom panel) show that the RGG motif deletion mutant of Top3 $\beta$  (RGG $\Delta$ ) has reduced ssDNA decatenase activity compared to the wild type protein.



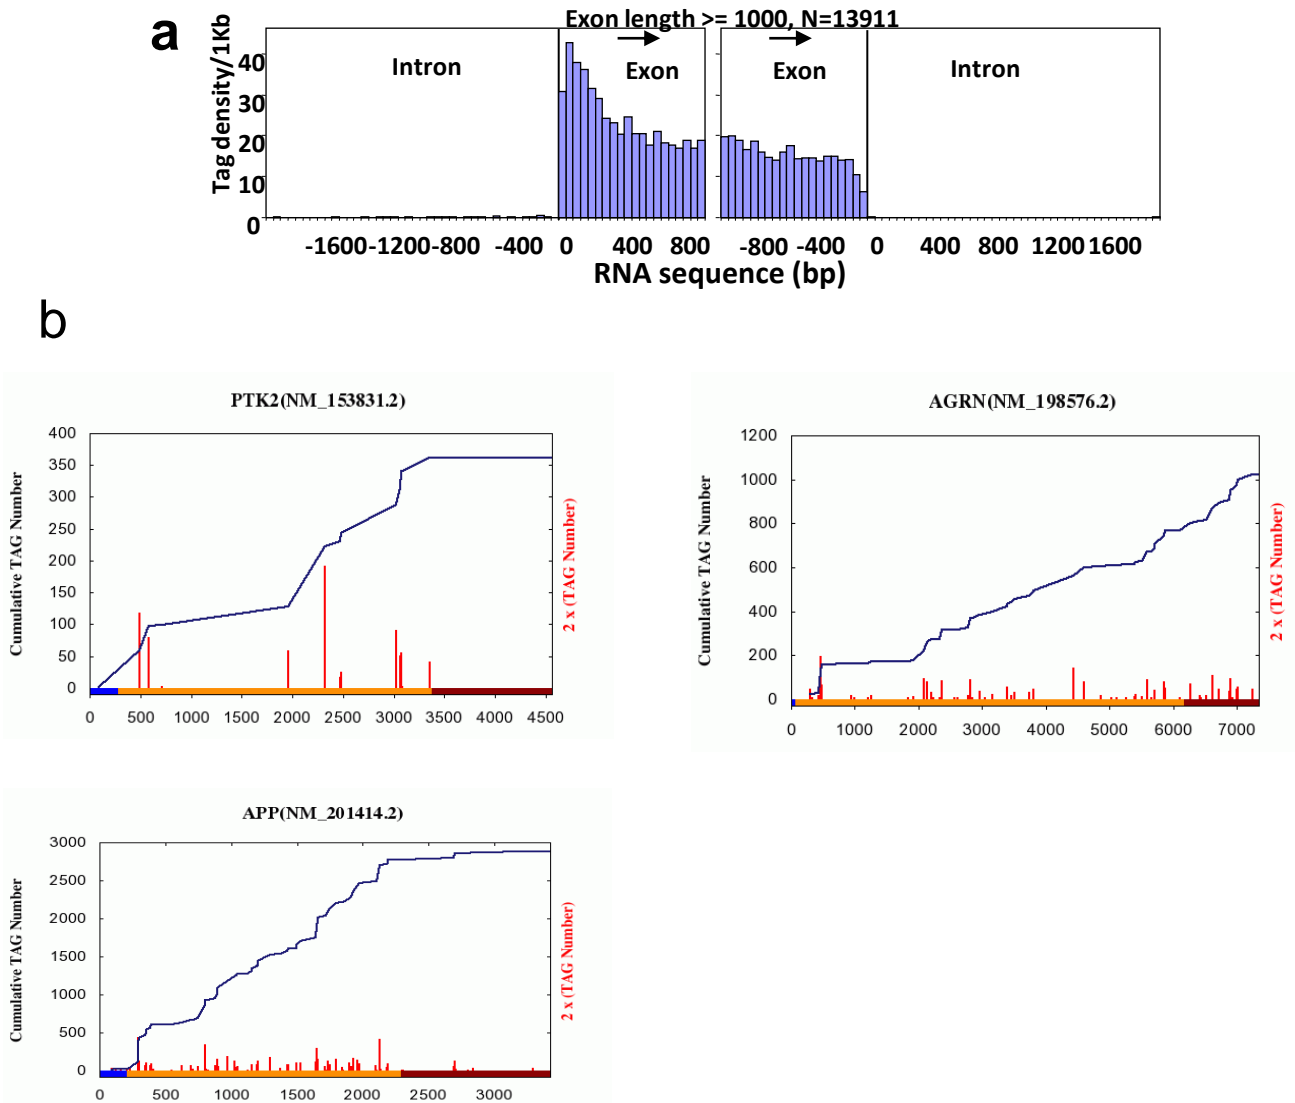

**Supplementary Figure 5. Top3 $\beta$  binding sites in RNAs in vivo are enriched in exons; Top3 $\beta$  binding tags are enriched in protein coding regions—a pattern similar to that of FMRP. (a)** Histograms illustrate that Top3-beta binding sites, represented by sequence tags identified by HITS-CLIP, preferentially map to exons, but not introns, suggesting that Top3 $\beta$  mainly binds to mature mRNAs. The number of sequence tags was counted at specific distances from exon start (left graph) and exon end (right graph) and then converted to tag density per 1 Kb. The lengths of exons and their numbers are indicated on top of each histogram. **(b)** Cumulative graphs show that the Top3 $\beta$  binding tags are enriched in protein coding regions (marked in orange) over 5' or 3' untranslated regions (marked in blue and purple, respectively). This pattern is highly similar to that described for FMRP (Darnell et al. Cell 2011).

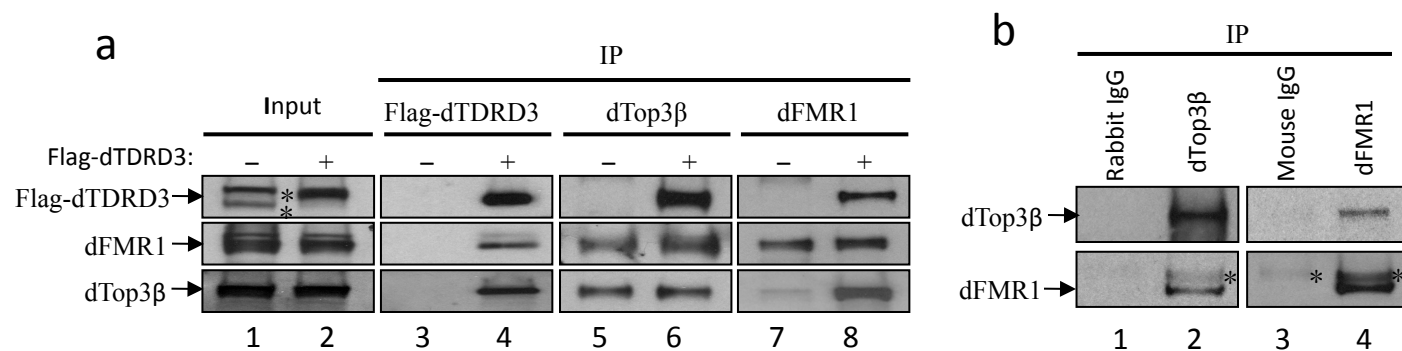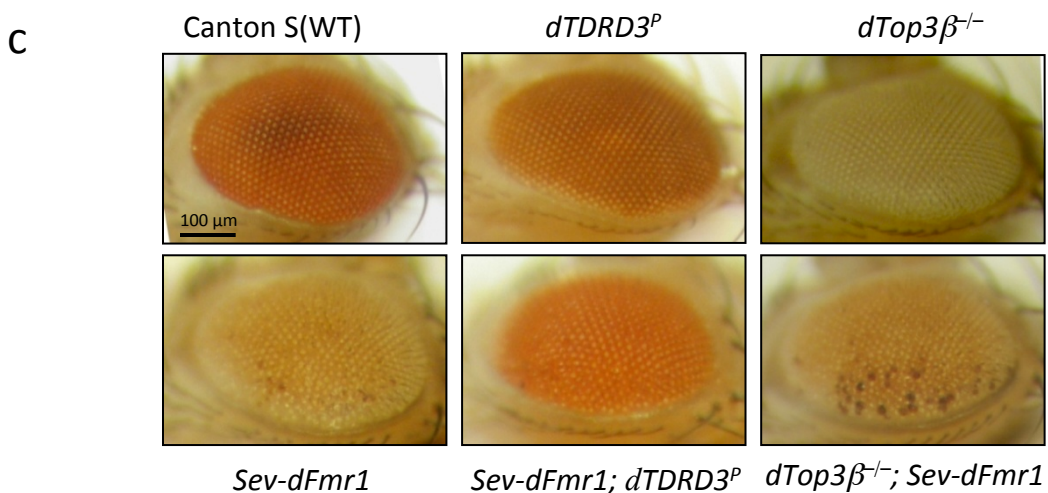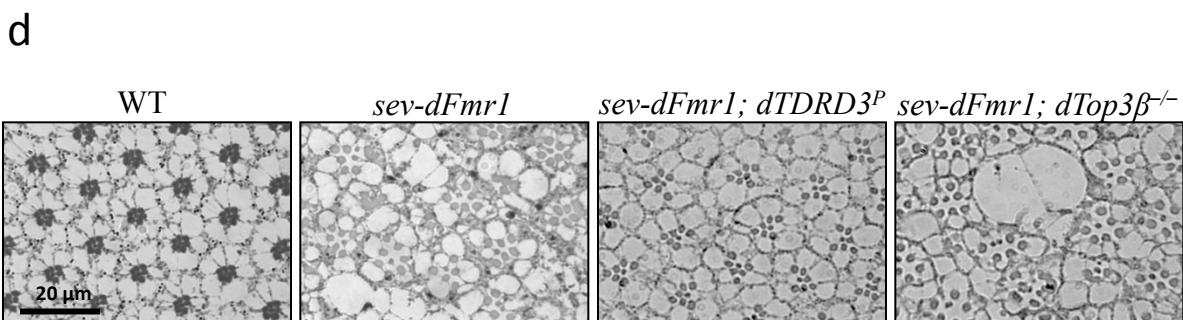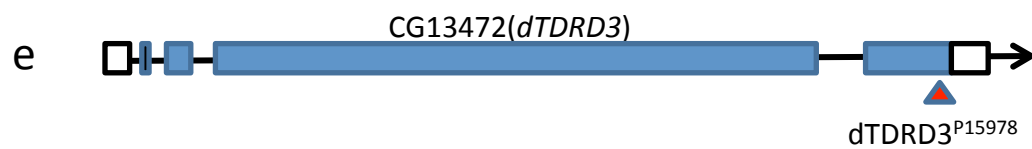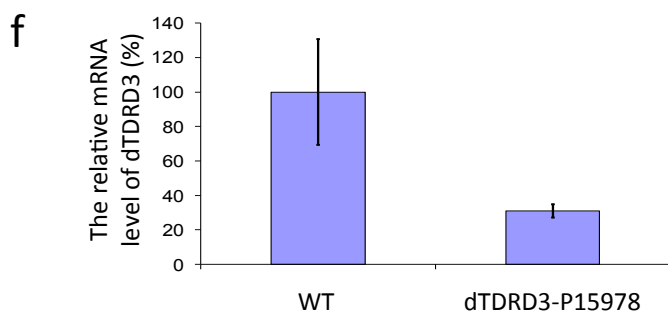

**Supplementary Figure 6. The association between Top3 $\beta$ -TDRD3 and FMR1 is conserved in *Drosophila*; mutations of Top3 $\beta$  and TDRD3 in *Drosophila* modify the rough eye phenotype induced by ectopic expression of FMR1.** (a) IP-Western shows co-immunoprecipitation of dTop3 $\beta$ , dTDRD3 and dFMR1 from extracts of the *Drosophila* S2 cells. The cells without or with ectopically expressed Flag-tagged dTDRD3 are indicated on top. Immunoprecipitations (IP) were performed using anti-Flag, anti-dTop3 $\beta$  and anti-dFMRP1 antibodies, as illustrated. A mock immunoprecipitation was performed using S2 cells that do not express Flag-dTDRD3. The crossreactive polypeptides are indicated with asterisks. Notably, over-expression of dTDRD3 increased the amount of dTop3 $\beta$  that co-immunoprecipitated with dFMR1 (compare lanes 8 and 7), consistent with the notion that TDRD3 serves as a bridge between the other two proteins. (b) Control experiments to show that dFMR1 and dTop3 $\beta$  were not immunoprecipitated by rabbit or mouse IgG from extracts of the *Drosophila* S2 cells. (c) Images from light microscopy (scale Bar 100  $\mu$ m), and (d) images from tangential sections (scale bar 20  $\mu$ m), of *Drosophila* compound eyes show genetic interactions of dFMR1 with Top3 $\beta$  and TDRD3. Images of *Drosophila* compound eyes of different genotypes are indicated on top. The rough eye phenotype induced by ectopic expression of *dFMR1* in the eye (*sev-dFmr1*) is suppressed by a reduction of function mutant of *dTDRD3* (*dTDRD3-P*), and is enhanced by *Top3 $\beta$  null* mutant. The scar-like spots in (c) are necrotic ommatidia which are quantified in Figure 6b. TDRD3 and Top3b mutant flies in the wildtype background have normal eye morphology (c). (e) Schematic view of the P-element insertion site at dTDRD3 genomic locus in dTDRD3<sup>P15978</sup> strain. (f) qRT-PCR chart shows that the dTDRD3 transcript level is reduced by about 70% in dTDRD3<sup>P15978</sup> line. The relative mRNA level of dTDRD3 is normalized by the dRp132 mRNA level. Mean and s.d. from three independent experiments are shown.

**a**

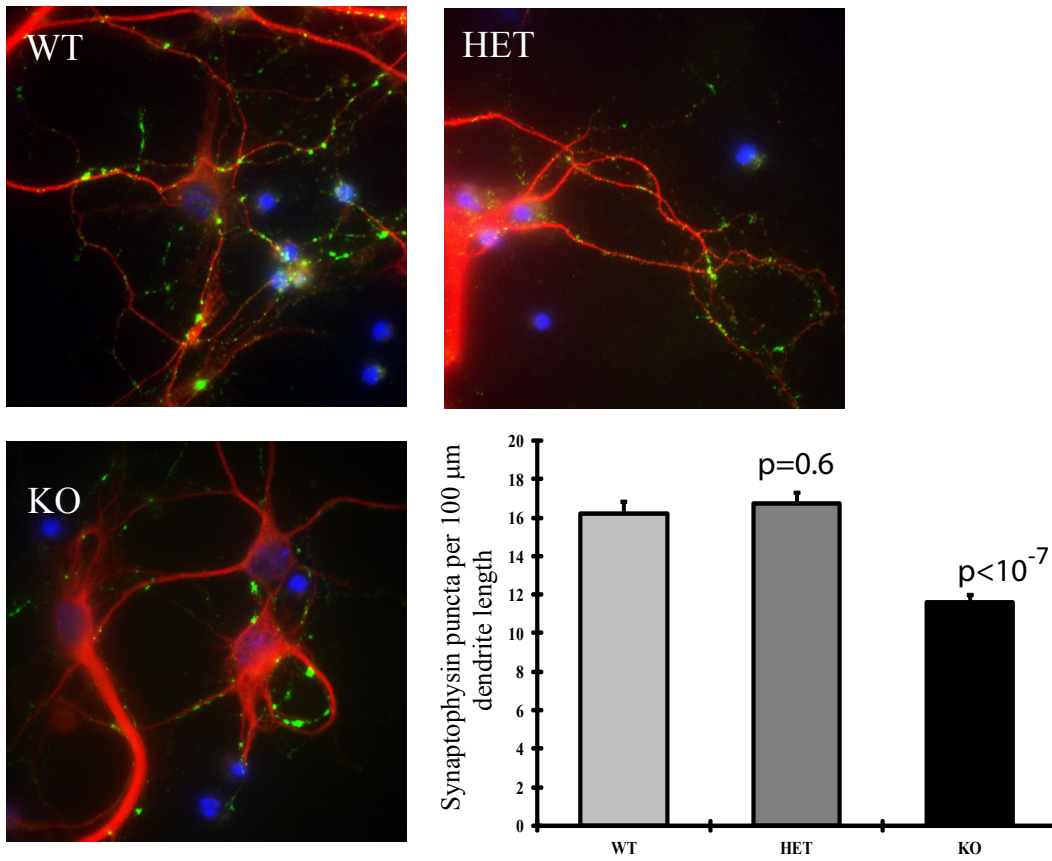

**b**

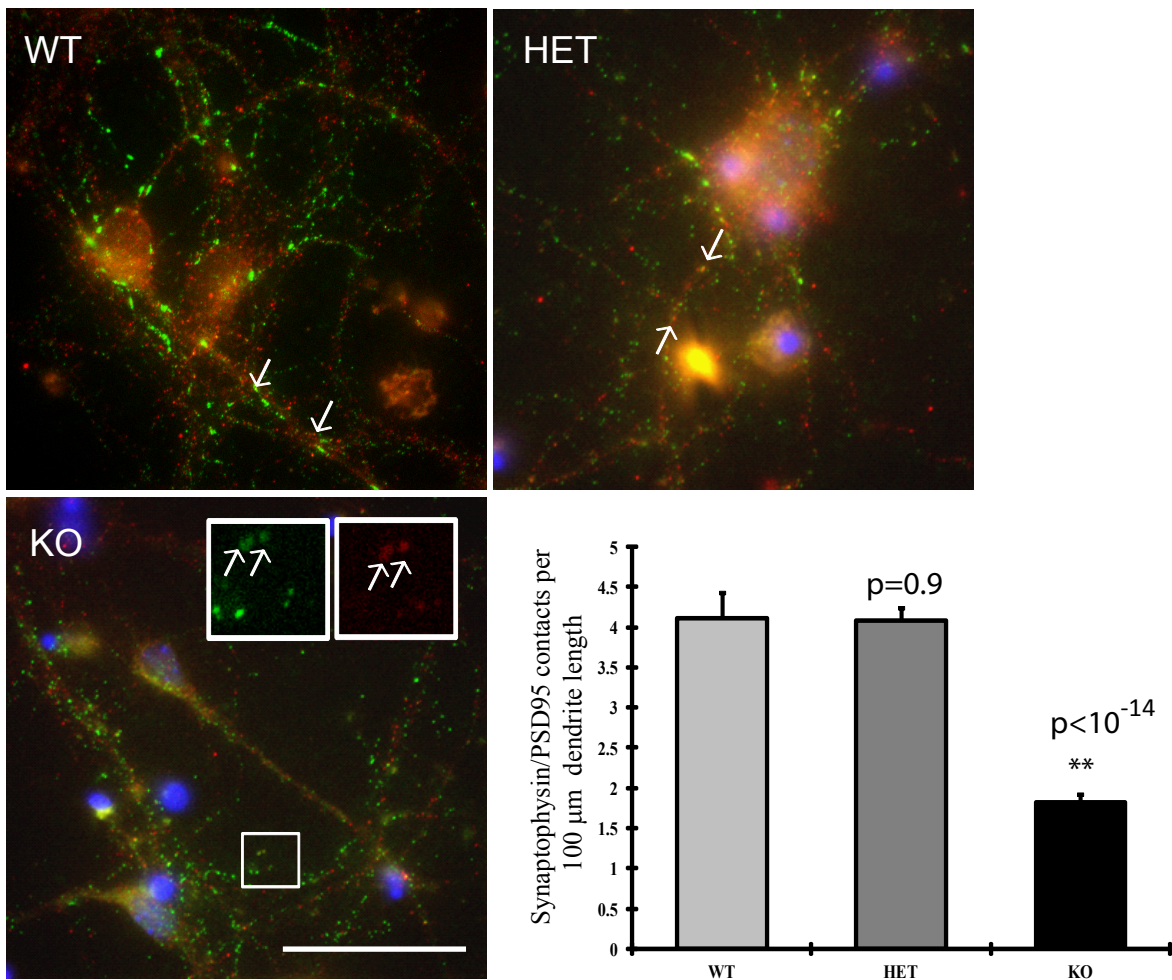

**Supplemental Figure 7. Synaptogenesis is abnormal in cultured cortical neurons from Top3 $\beta$ -knockout mice.** (a) Immunostaining shows reduced presynaptic vesicles in cultured cortical neurons of Top3 $\beta$ -knockout mice. Synaptophysin (green) and MAP2 (red) antibodies were used to stain presynaptic vesicles and dendrites, respectively, in cultured neurons (10 days) from wide type (WT), heterozygous (HET) and knockout (KO) mice. The number of synaptophysin puncta along a defined length of a dendrite was counted. Quantified data were obtained from one WT, two HET and four KO mice from the same litter. *P* values between WT and HET, and between WT and KO, were calculated using Student T-test; and the results were listed on top of the data bar. Scale bar, 100  $\mu$ m. (b) Immunostaining shows reduced number of synapses in cultured cortical neurons of Top3 $\beta$ -knockout mice. Synaptophysin (green) and PSD95 (red) were co-stained to indicate synapses (merged) in cultured neurons (10 days) from the same mice as in (a). The arrows indicate co-localized puncta of synaptophysin and PSD95, which were counted along neurites as (a). The small islet boxes showed an example of co-localized synaptophysin and PSD95 using two separate light channels. Quantitative data indicate reduced synaptogenesis in Top3 $\beta$ -deficient cortical neurons. *P* values between WT and HET, and between WT and KO, were calculated using Student T-test; and the results were listed on top of the data bar. Scale bar, 100  $\mu$ m.

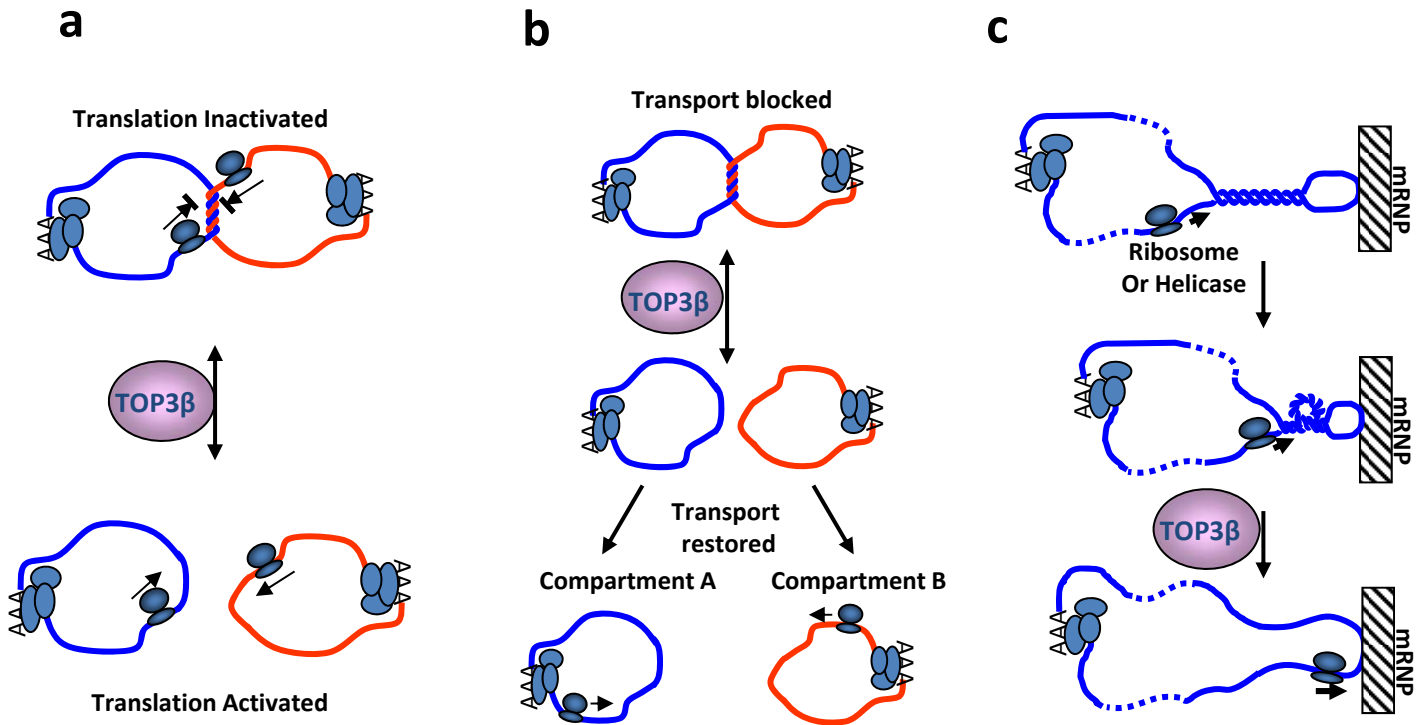

**Supplementary Figure 8. Models for why RNA metabolism may create topological problems that need an RNA topoisomerase to solve.**

(a)(b) Models to illustrate that Top3β may catalyze catenation or decatenation of two mRNA circles, thus enhancing or inhibiting translation (b) or transport of mRNAs (c). It has been shown that mRNA circles can form when two ends of mRNA interacting with a common protein. (c) A model illustrates that helical torsions may arise when a translating ribosome or a helicase unwinds a duplex region in an mRNA hairpin. If the hairpin is bound to an immobile mRNP or cellular matrix, the helical torsion will not be relieved by rotation. Such torsion may impede progression of ribosomes or RNA helicases during translation or transport. Top3β can relax the helical torsion through its strand passage activity. (d) Top3b may interconvert cirRNAs to knot or catenane structures, which may affect the function of these RNAs.

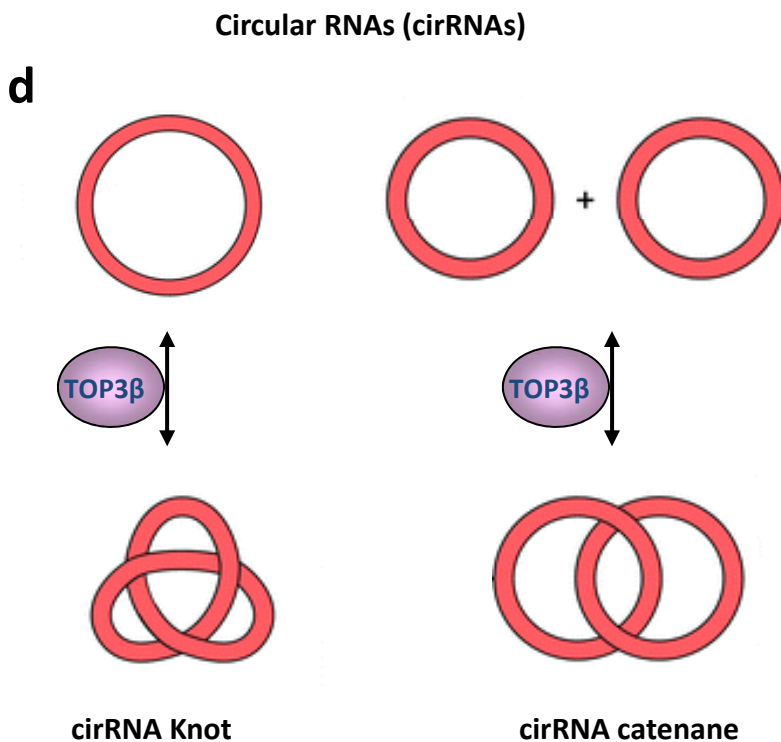

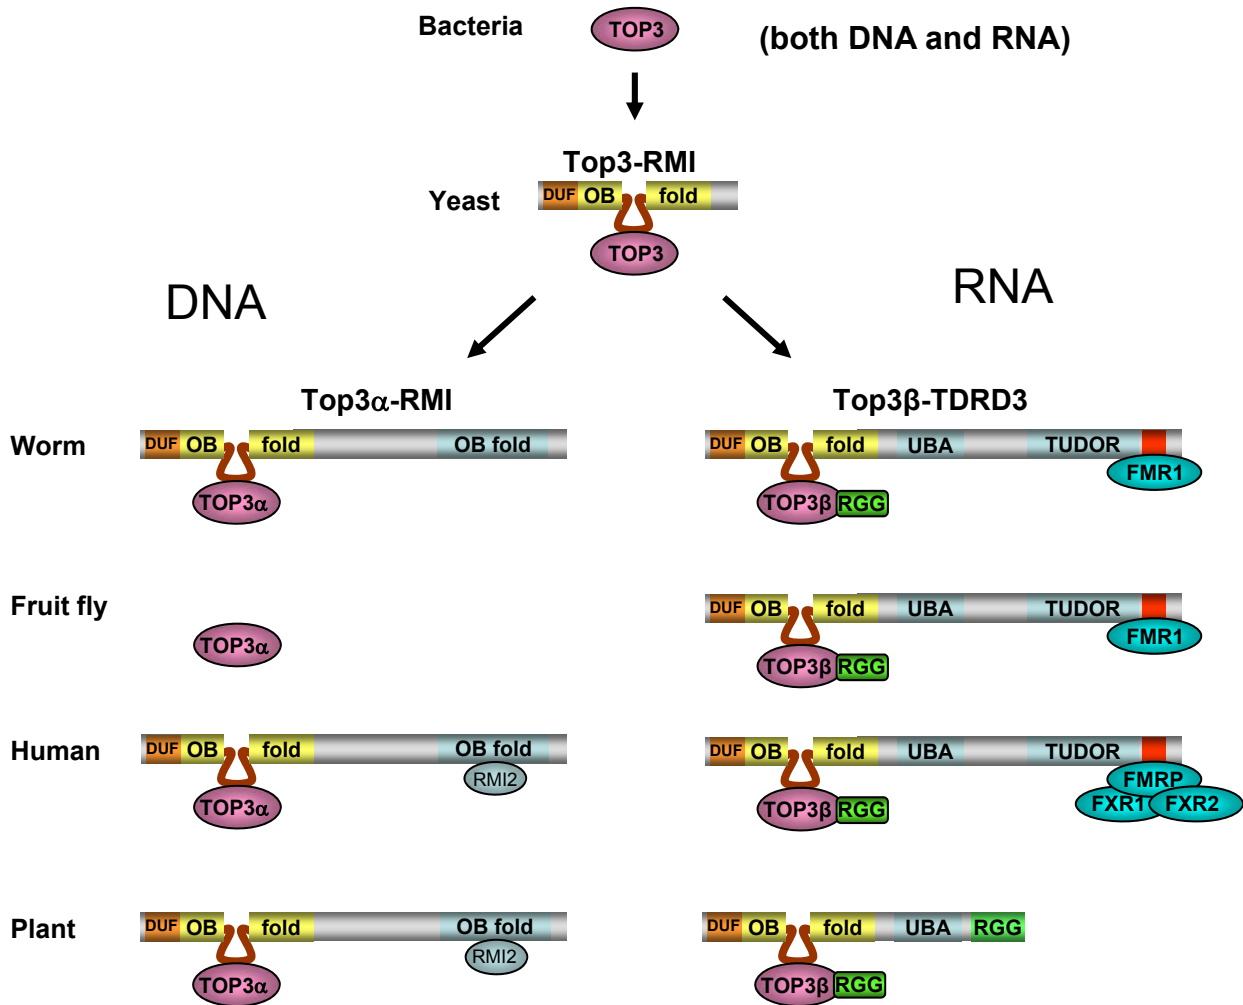

**Supplementary Figure 9. Top3 has evolved to become two homologous complexes with distinct functions in RNA and DNA metabolism.**

Schematic presentations to show how Top3 has evolved to become two homologous complexes, Top3 $\alpha$ -RMI1 and Top3 $\beta$ -TDRD3, which have distinct functions in DNA and RNA metabolism, respectively.

Bacteria have a single copy of Top3 that can catalyze both DNA and RNA strand passage reactions, but it has no orthologs of RMI1.

Yeast have a single copy of Top3 and RMI. They form a complex that is required for maintenance of genomic stability. It remains unclear whether it also functions in RNA metabolism.

In higher eukaryotes, Top3 has evolved into two paralogous complexes: the Top3 $\alpha$ -RMI1 complex, which retains its function in the maintenance of genomic stability but lost the ability to catalyze RNA strand passage reactions, and the Top3 $\beta$ -TDRD3 complex, which works in RNA metabolism. Top3 $\beta$  may have acquired an RGG-box RNA binding motif through gene fusion, and retained the ability to resolve topological problems for RNA. The two Top3 complexes not only have a homologous catalytic subunit in Top3 $\alpha$  and Top3 $\beta$ , but also a homologous partner subunit, RMI1 and TDRD3, respectively. In fact, RMI1 and TDRD3 are the only metazoan proteins containing both a DUF1767 domain and a unique OB-fold with an intervening region, indicating that they are paralogs derived from a common ancestor. This ancestor likely resembles the single RMI1 protein from yeast, which consists of only the DUF1767 and OB-fold domains. The unique C-terminal domains in RMI1 and TDRD3 of higher eukaryotes are likely acquired through gene fusions later in evolution. These domains provide unique protein-binding surfaces to allow their respective topoisomerases to interact with specific regulators, such as FMRP or RMI2.

Interestingly, the Top3 $\beta$ -TDRD3 complex can associate with FMRP through the C-terminal region of TDRD3 and modulate FMRP function in animals. In contrast, plants do not have an ortholog of FMR1 and the C-terminal region of TDRD3 is similar to those found in several protozoans, which encodes a C-terminal RGG-box motif but lacks both the metazoan UBA and TUDOR domains.



# Full-length pictures of the blots in the main figures

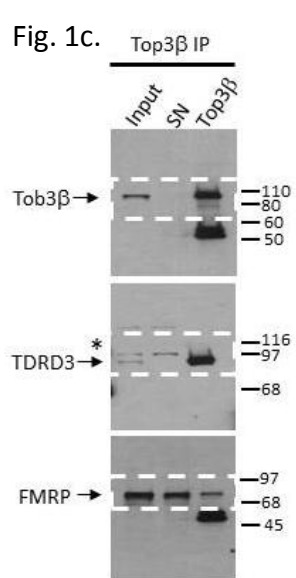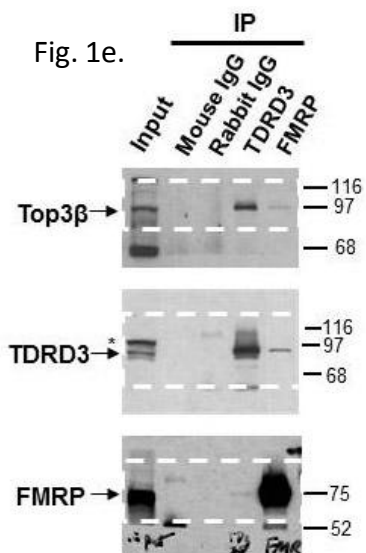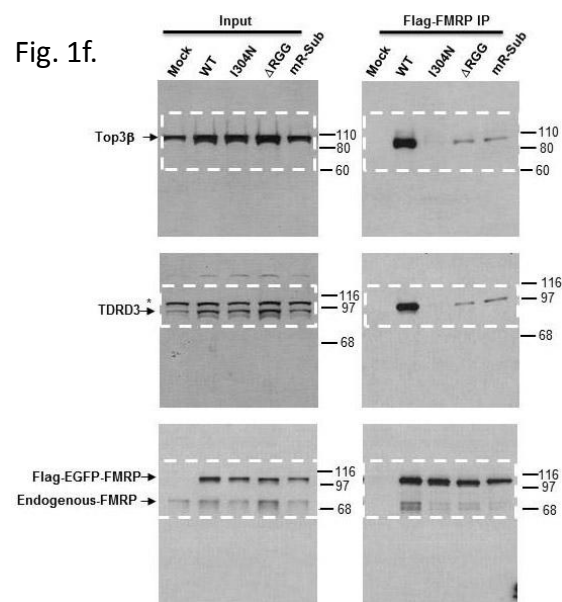

**Fig. 2a.**

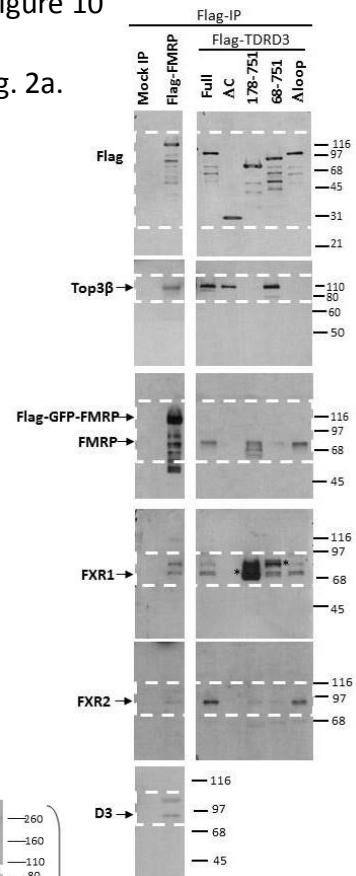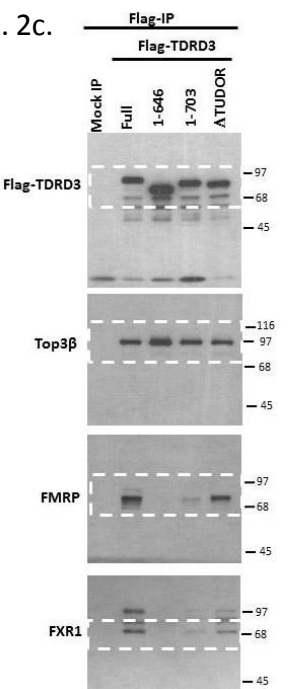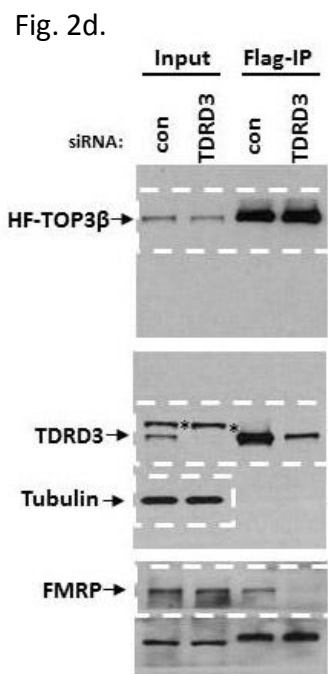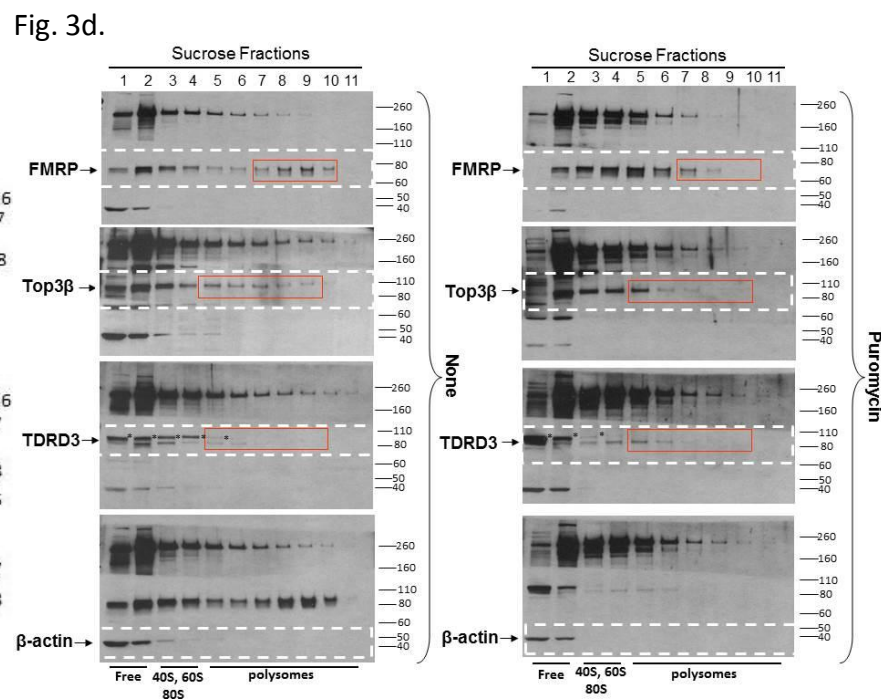

**Supplementary Table 1. The number of peptides identified by mass spectrometry analyses of the entire Top3 $\beta$  immunoprecipitates from cells untreated or treated with RNase A**

| Proteins     | Number of peptides (- RNase) | Number of peptides (+RNase ) |
|--------------|------------------------------|------------------------------|
| Top3 $\beta$ | 33                           | 42                           |
| TDRD3        | 36                           | 48                           |
| FMRP         | 15                           | 11                           |
| FXR2         | 20                           | 10                           |
| FXR1         | 17                           | 7                            |
| IGF2BP1*     | 17                           | 0                            |
| EIF4A3*      | 21                           | 0                            |
| PABPC1*      | 29                           | 0                            |
| TUBB2C**     | 13                           | 13                           |
| HSPA9**      | 16                           | 17                           |

**Legend.** A partial list of the peptides identified by mass spectrometry analyses of the entire Top3 $\beta$  immunoprecipitates from whole cell extracts. The silver-stained SDS-gel analyses of the immunoprecipitate was shown in Figure 1b. Cells were either treated or untreated with RNase A as indicated. The single asterisk marks several RNA binding proteins whose presence in Top3 $\beta$  IP depends on RNA. The double asterisks indicate two contaminating polypeptides whose presence does not depend on RNA. Notably, TDRD3, FMRP and its homologs do not depend on RNA for their presence.

**Supplementary Table 2. Number of sequenced tags in Top3 $\beta$  HITS-CLIP**

| Category of Top3 $\beta$ tags     | Total    | Sense   | Antisense | %sense |
|-----------------------------------|----------|---------|-----------|--------|
| Total tags                        | 21774326 |         |           |        |
| Tags not matched to hg18          | 10761490 |         |           |        |
| Tags matched to hg18              | 11012836 |         |           |        |
| unique                            | 2773915  |         |           |        |
| 2-5 matches                       | 7959287  |         |           |        |
| >5 matches                        | 279634   |         |           |        |
| Tags matched to RefSeq (directly) | 2285222  | 2211865 | 32579     | 98.55  |
| Tags matched to RefSeq genes      | 2422267  | 2321609 | 100658    | 95.84  |
| Tags matched to RefSeq exons      | 1847106  | 1835428 | 11678     | 99.37  |
| Tags matched to RefSeq introns    | 575161   | 486181  | 88980     | 84.53  |

**Supplementary Table 3. The top Top3 $\beta$ -bound mRNAs that match the FMRP targets**

| #GID-GSE23316 | gene Human | gene Mouse | Ntags (Top3b CLIP) | Npeaks | mRNA_len | RNA-seq rep1 (GSM591682) | RNA-seq rep2 (GSM591659) | Average RNAseq | ORF_len,aa | Ratio1   | MatchFMRP(Darnell) |
|---------------|------------|------------|--------------------|--------|----------|--------------------------|--------------------------|----------------|------------|----------|--------------------|
| 1952          | CELSR2     | Celsr2     | 3667               | 187    | 10540    | 8.11                     | 5.74                     | 6.925          | 2923       | 11.04874 | 1                  |
| 488           | TNRC18     | Tnrc18     | 1340               | 87     | 10586    | 0.05                     | 0.04                     | 0.045          | 2968       | 8.661025 | 1                  |
| 3897          | PKD1       | Pkd1       | 2861               | 152    | 14138    | 12.2                     | 9.42                     | 10.81          | 4303       | 7.304181 | 1                  |
| 5591          | PCNXL3     | Pcnxl3     | 2659               | 130    | 6584     | 10.1                     | 13.43                    | 11.74          | 2034       | 5.979761 | 1                  |
| 871           | LPHN1      | Lphn1      | 1392               | 67     | 7874     | 1.69                     | 2.02                     | 1.855          | 1587       | 5.651624 | 1                  |
| 23250         | MLL2       | Mll2       | 2510               | 113    | 19432    | 9.03                     | 11                       | 10.015         | 5537       | 5.645766 | 1                  |
| 7916          | NOMO3      | Nomo1      | 1852               | 71     | 4315     | 2.48                     | 2.93                     | 2.705          | 1222       | 5.588351 | 1                  |
| 729086        | TTYH3      | Ttyh3      | 1330               | 68     | 4838     | 4.05                     | 3.22                     | 3.635          | 523        | 4.987165 | 1                  |
| 1362          | PTPRS      | Ptprs      | 1678               | 91     | 7347     | 11                       | 7.33                     | 9.185          | 1948       | 4.743289 | 1                  |
| 2799          | LMTK2      | Lmtk2      | 982                | 51     | 8961     | 1.8                      | 2.04                     | 1.92           | 1503       | 4.278523 | 1                  |
| 8940          | KIAA0100   | 2610507B1  | 4642               | 155    | 7456     | 21.3                     | 34.08                    | 27.675         | 2235       | 4.114134 | 1                  |
| 7132          | PTPRJ      | Ptprij     | 1647               | 68     | 7854     | 5.29                     | 8.4                      | 6.845          | 1451       | 4.036806 | 1                  |
| 250           | ODZ3       | Odz3       | 1013               | 41     | 10810    | 0.56                     | 0.53                     | 0.545          | 2699       | 3.888099 | 1                  |
| 286077        | NDST1      | Ndst1      | 829                | 50     | 8030     | 3.21                     | 4.24                     | 3.725          | 882        | 3.642987 | 1                  |
| 79158         | PCNX       | Pcnx       | 1196               | 58     | 12936    | 6.86                     | 5.82                     | 6.34           | 2341       | 3.549572 | 1                  |
| 975           | ATP2B4     | Atp2b4     | 1482               | 58     | 8911     | 8.21                     | 5.65                     | 6.93           | 1170       | 3.425871 | 1                  |
| 10908         | MACF1      | Macf1      | 1699               | 56     | 19271    | 8.2                      | 7.15                     | 7.675          | 5938       | 3.168317 | 1                  |
| 24145         | BIRC6      | Birc6      | 1361               | 51     | 15718    | 6.01                     | 7.16                     | 6.585          | 4857       | 3.075068 | 1                  |
| 3340          | PLXNA1     | Plxna1     | 1095               | 61     | 9071     | 8.99                     | 11.14                    | 10.065         | 1896       | 3.04012  | 1                  |
| 1122          | PLXND1     | Plxnd1     | 1403               | 56     | 6977     | 11.2                     | 7.52                     | 9.355          | 2070       | 2.893309 | 1                  |
| 6522          | BAT2       | Bat2       | 1365               | 74     | 6921     | 16.2                     | 18.31                    | 17.27          | 2157       | 2.713605 | 1                  |
| 5420          | FASN       | Fasn       | 2519               | 120    | 8481     | 31.6                     | 37.7                     | 34.64          | 2511       | 2.688172 | 1                  |
| 4035          | NOMO2      | Nomo1      | 1842               | 72     | 4317     | 13.8                     | 20.12                    | 16.935         | 1222       | 2.673102 | 1                  |
| 6489          | MLL3       | Mll3       | 655                | 30     | 16872    | 1.22                     | 1.34                     | 1.28           | 4911       | 2.659574 | 1                  |
| 1889          | EXTL3      | Extl3      | 1007               | 42     | 6172     | 4.76                     | 6.84                     | 5.8            | 919        | 2.658228 | 1                  |
| 84220         | DST        | Dst        | 737                | 33     | 16652    | 2.44                     | 2.59                     | 2.515          | 5171       | 2.636836 | 1                  |
| 10130         | SCAP       | Scap       | 1222               | 68     | 4255     | 13.2                     | 18.96                    | 16.075         | 1279       | 2.607862 | 1                  |
| 7846          | PTPRF      | Ptprf      | 4251               | 170    | 7733     | 58.6                     | 55.42                    | 56.985         | 1907       | 2.537882 | 1                  |
| 92140         | WNK1       | Wnk1       | 1986               | 68     | 11232    | 17.7                     | 16.14                    | 16.93          | 2642       | 2.525065 | 1                  |
| 2802          | KIAA0802   | 1110012J1  | 570                | 30     | 6092     | 2.76                     | 1.7                      | 2.23           | 1586       | 2.452984 | 1                  |
| 4105          | INTS1      | Ints1      | 890                | 44     | 7000     | 7.2                      | 8.84                     | 8.02           | 2190       | 2.441731 | 1                  |
| 26100         | HERC2      | Herc2      | 1129               | 44     | 15334    | 8.46                     | 8                        | 8.23           | 4834       | 2.413604 | 1                  |
| 221955        | MYH10      | Myh10      | 502                | 30     | 7619     | 2.47                     | 2.66                     | 2.565          | 1976       | 2.387585 | 1                  |
| 2192          | ANKRD11    | Ankrd11    | 1237               | 61     | 9326     | 12.3                     | 20.65                    | 16.465         | 2663       | 2.304931 | 1                  |
| 57634         | MYO10      | Myo10      | 935                | 39     | 11436    | 6.11                     | 8.27                     | 7.19           | 2058       | 2.268761 | 1                  |
| 55714         | GCN1L1     | Gcn1l1     | 2187               | 83     | 8699     | 23.2                     | 30.07                    | 26.645         | 2671       | 2.264975 | 1                  |
| 22856         | LRP1       | Lrp1       | 1593               | 77     | 14905    | 40.1                     | 8.1                      | 24.105         | 4544       | 2.257733 | 1                  |

|        |           |          |      |     |       |      |       |        |      |          |   |
|--------|-----------|----------|------|-----|-------|------|-------|--------|------|----------|---|
| 10079  | PCDH7     | Pcdh7    | 503  | 29  | 8728  | 3.02 | 2.92  | 2.97   | 1255 | 2.235929 | 1 |
| 10613  | MLL       | Mlll1    | 1004 | 37  | 16608 | 6.53 | 6.65  | 6.59   | 3972 | 2.230259 | 1 |
| 23224  | NSD1      | Nsd1     | 940  | 37  | 12998 | 5.59 | 8.25  | 6.92   | 2696 | 2.186761 | 1 |
| 66008  | LRRN2     | Lrrn2    | 432  | 21  | 3227  | 0    | 0.01  | 0.005  | 713  | 2.098951 | 1 |
| 6046   | ARHGEF17  | Arhgef17 | 552  | 31  | 7830  | 7.51 | 5.37  | 6.44   | 2063 | 1.885645 | 1 |
| 1282   | TRRAP     | Trrap    | 688  | 28  | 12596 | 4.97 | 4.89  | 4.93   | 3830 | 1.875419 | 1 |
| 3678   | NLGN2     | Nlgn2    | 968  | 42  | 4642  | 17   | 8.35  | 12.665 | 995  | 1.853077 | 1 |
| 2137   | SPTBN1    | Spnb2    | 2017 | 70  | 10238 | 28.5 | 27.44 | 27.96  | 2364 | 1.844046 | 1 |
| 23420  | DYNC1H1   | Dync1h1  | 1933 | 77  | 14361 | 29.8 | 33.72 | 31.77  | 4646 | 1.843428 | 1 |
| 10682  | DGCR2     | Dgcr2    | 765  | 34  | 4504  | 7.99 | 9.17  | 8.58   | 550  | 1.829925 | 1 |
| 140707 | NAV1      | Nav1     | 233  | 20  | 13029 | 0.9  | 1.05  | 0.975  | 1877 | 1.822323 | 1 |
| 9780   | NOMO1     | Nomo1    | 1849 | 69  | 4261  | 21.6 | 34.33 | 27.975 | 1222 | 1.816985 | 1 |
| 80020  | TNS3      | Tns3     | 574  | 22  | 7697  | 2.28 | 2.49  | 2.385  | 1540 | 1.776342 | 1 |
| 10555  | SHANK3    | Shank3   | 396  | 18  | 7145  | 0.31 | 0.33  | 0.32   | 1852 | 1.744186 | 1 |
| 444    | EP300     | Ep300    | 552  | 31  | 8761  | 7.12 | 9.2   | 8.16   | 2414 | 1.707048 | 1 |
| 399687 | NCOR1     | Ncor1    | 641  | 17  | 9809  | 0    | 0     | 0      | 2440 | 1.7      | 1 |
| 9793   | MAPK4     | Mapk4    | 307  | 17  | 4736  | 0.39 | 0.06  | 0.225  | 587  | 1.662592 | 1 |
| 6520   | ATP2A2    | Atp2a2   | 3177 | 119 | 8329  | 53.6 | 73.18 | 63.395 | 1157 | 1.621364 | 1 |
| 1499   | ANAPC1    | Anapc1   | 651  | 31  | 6329  | 9.09 | 9.78  | 9.435  | 1944 | 1.59506  | 1 |
| 6840   | AGPAT3    | Agpat3   | 654  | 27  | 6555  | 6.41 | 7.64  | 7.025  | 376  | 1.585903 | 1 |
| 412    | NAT8L     | Nat8l    | 295  | 19  | 5894  | 1.92 | 2.21  | 2.065  | 459  | 1.574803 | 1 |
| 8712   | PDZD8     | Pdzd8    | 623  | 25  | 3853  | 5.73 | 6.22  | 5.975  | 1154 | 1.564945 | 1 |
| 23326  | SPEN      | Spn      | 771  | 31  | 12227 | 9.63 | 10.5  | 10.065 | 3664 | 1.544979 | 1 |
| 23524  | PLXNA2    | Plxna2   | 349  | 17  | 11457 | 1.04 | 1.22  | 1.13   | 1909 | 1.527403 | 1 |
| 55636  | SETD5     | Setd5    | 839  | 35  | 6827  | 14.1 | 12.36 | 13.205 | 1442 | 1.508296 | 1 |
| 57142  | EP400     | Ep400    | 636  | 28  | 12265 | 8.04 | 9.15  | 8.595  | 3122 | 1.505781 | 1 |
| 1059   | TLN2      | Tln2     | 350  | 18  | 11650 | 1.14 | 2.79  | 1.965  | 2542 | 1.504388 | 1 |
| 135114 | HUWE1     | Huwe1    | 2136 | 93  | 14734 | 46.4 | 57.69 | 52.06  | 4374 | 1.49855  | 1 |
| 27173  | TRIO      | Trio     | 933  | 34  | 10244 | 13   | 12.81 | 12.91  | 3097 | 1.484068 | 1 |
| 5797   | C20orf117 | 9830001H | 483  | 18  | 8036  | 2.43 | 1.87  | 2.15   | 1866 | 1.481481 | 1 |
| 83639  | POLR2A    | Polr2a   | 1189 | 64  | 6738  | 26.6 | 40.01 | 33.315 | 1970 | 1.477548 | 1 |
| 949    | PCDH1     | Pcdh1    | 621  | 24  | 4779  | 5.27 | 7.66  | 6.465  | 1237 | 1.457637 | 1 |
| 9343   | ITPR1     | Itpr1    | 749  | 22  | 10197 | 7.39 | 3.33  | 5.36   | 2743 | 1.432292 | 1 |
| 57622  | ARHGAP21  | Arhgap21 | 631  | 25  | 7185  | 7.41 | 7.61  | 7.51   | 1958 | 1.427756 | 1 |
| 78999  | KIAA0947  | BC018507 | 684  | 35  | 7966  | 13.2 | 16.17 | 14.665 | 2266 | 1.419015 | 1 |
| 10067  | TNRC6B    | Tnrc6b   | 535  | 16  | 18297 | 1.38 | 1.53  | 1.455  | 1833 | 1.39677  | 1 |
| 8943   | ARNT2     | Arnt2    | 518  | 24  | 6576  | 10.4 | 4.08  | 7.225  | 825  | 1.393324 | 1 |
| 27     | FOXK2     | Foxk2    | 787  | 32  | 5262  | 13.1 | 12.84 | 12.975 | 660  | 1.392818 | 1 |
| 6745   | ASH1L     | Ash1l    | 678  | 27  | 11784 | 9.12 | 9.68  | 9.4    | 2964 | 1.391753 | 1 |
| 6609   | TULP4     | Tulp4    | 310  | 15  | 11123 | 0.78 | 0.91  | 0.845  | 1543 | 1.383126 | 1 |
| 1718   | FSCN1     | Fscn1    | 1439 | 77  | 2819  | 43.9 | 47.91 | 45.895 | 493  | 1.377583 | 1 |
| 9695   | OGDH      | Ogdh     | 595  | 26  | 4319  | 6.73 | 11.45 | 9.09   | 1023 | 1.36197  | 1 |
| 60528  | SKI       | Ski      | 374  | 25  | 5707  | 9.82 | 7.03  | 8.425  | 728  | 1.356852 | 1 |
| 55699  | ADNP      | Adnp     | 988  | 43  | 4713  | 22.3 | 21.54 | 21.935 | 1102 | 1.346485 | 1 |
| 6747   | HCFC1     | Hcfc1    | 573  | 37  | 8436  | 15.9 | 19.4  | 17.665 | 2035 | 1.33743  | 1 |
| 79827  | SREBF2    | Srebf2   | 1216 | 44  | 4325  | 27.2 | 18.68 | 22.915 | 1141 | 1.336777 | 1 |
| 56052  | CABIN1    | Cabin1   | 574  | 23  | 7222  | 7.38 | 7.78  | 7.58   | 2220 | 1.308305 | 1 |

|        |          |           |      |     |       |      |       |         |      |          |   |
|--------|----------|-----------|------|-----|-------|------|-------|---------|------|----------|---|
| 9536   | CHD4     | Chd4      | 1455 | 60  | 6511  | 34.3 | 39.15 | 36.735  | 1912 | 1.283834 | 1 |
| 1191   | MFHAS1   | Mfhas1    | 435  | 20  | 5255  | 6.24 | 5.01  | 5.625   | 1052 | 1.28     | 1 |
| 3753   | SIPA1L2  | Sipa1l2   | 350  | 13  | 6501  | 0.17 | 0.17  | 0.17    | 1722 | 1.278269 | 1 |
| 9703   | ATP1A1   | Atp1a1    | 4504 | 157 | 3778  | 119  | 112.3 | 115.695 | 1023 | 1.249055 | 1 |
| 334    | PRPF8    | Prpf8     | 2403 | 87  | 7311  | 55.3 | 66    | 60.635  | 2335 | 1.231684 | 1 |
| 84975  | BCL9L    | Bcl9l     | 453  | 27  | 7740  | 12.3 | 12.55 | 12.42   | 1499 | 1.204282 | 1 |
| 55624  | JAK1     | Jak1      | 972  | 32  | 5053  | 21.7 | 11.88 | 16.775  | 1154 | 1.195145 | 1 |
| 6830   | LRP8     | Lrp8      | 545  | 22  | 4528  | 8.13 | 9.17  | 8.65    | 963  | 1.179625 | 1 |
| 140453 | TLE3     | Tle3      | 604  | 33  | 5354  | 17.9 | 18.34 | 18.1    | 772  | 1.174377 | 1 |
| 23170  | TANC2    | Tanc2     | 436  | 21  | 11747 | 7.89 | 8.28  | 8.085   | 2105 | 1.161183 | 1 |
| 2677   | CHD3     | Chd3      | 774  | 41  | 7372  | 27.3 | 24.29 | 25.805  | 2059 | 1.145091 | 1 |
| 283149 | ZCCHC14  | Zcchc14   | 384  | 25  | 6932  | 12   | 11.75 | 11.88   | 949  | 1.142596 | 1 |
| 55027  | SIPA1L3  | Sipa1l3   | 326  | 14  | 7984  | 2.31 | 2.26  | 2.285   | 1781 | 1.139601 | 1 |
| 56913  | USP34    | Usp34     | 838  | 26  | 11326 | 11.8 | 13.97 | 12.89   | 3546 | 1.135867 | 1 |
| 84268  | ZHX3     | Zhx3      | 313  | 14  | 9991  | 2.52 | 2.25  | 2.385   | 956  | 1.1304   | 1 |
| 3339   | EIF4G1   | Eif4g1    | 2588 | 101 | 5686  | 62.7 | 96.77 | 79.715  | 1600 | 1.125787 | 1 |
| 23139  | CELSR3   | Celsr3    | 197  | 15  | 11974 | 3.56 | 3.27  | 3.415   | 3312 | 1.118151 | 1 |
| 4043   | BAZ2A    | Baz2a     | 623  | 33  | 8934  | 19.8 | 19.26 | 19.52   | 1905 | 1.117886 | 1 |
| 9618   | ATP9A    | Atp9a     | 459  | 19  | 7580  | 8.52 | 5.57  | 7.045   | 1047 | 1.114696 | 1 |
| 5962   | HDAC4    | Hdac4     | 175  | 12  | 8980  | 1.3  | 0.97  | 1.135   | 1200 | 1.077683 | 1 |
| 1654   | REV3L    | Rev3l     | 327  | 14  | 10719 | 2.55 | 3.53  | 3.04    | 3130 | 1.07362  | 1 |
| 23196  | USP9X    | Usp9x     | 555  | 31  | 12401 | 17.7 | 20.05 | 18.88   | 2570 | 1.073407 | 1 |
| 286410 | NCOR2    | Ncor2     | 416  | 31  | 8901  | 19.6 | 18.59 | 19.085  | 2524 | 1.065841 | 1 |
| 4059   | CREBBP   | Crebbp    | 471  | 20  | 10197 | 8.23 | 9.52  | 8.875   | 2442 | 1.059603 | 1 |
| 1495   | LARS2    | Lars2     | 456  | 18  | 4203  | 5.18 | 8.86  | 7.02    | 903  | 1.057579 | 1 |
| 54583  | NPTXR    | Nptxr     | 241  | 12  | 5814  | 1.23 | 1.57  | 1.4     | 599  | 1.052632 | 1 |
| 7175   | HERC1    | Herc1     | 493  | 17  | 15216 | 7.08 | 5.26  | 6.17    | 4861 | 1.05133  | 1 |
| 55654  | SPTBN2   | Spnb3     | 700  | 31  | 7884  | 16.1 | 23.34 | 19.7    | 2390 | 1.043771 | 1 |
| 51421  | GRLF1    | Grfl1     | 511  | 20  | 8904  | 9.11 | 9.41  | 9.26    | 1499 | 1.038422 | 1 |
| 171023 | TTC3     | Ttc3      | 754  | 28  | 9021  | 15.1 | 19.18 | 17.115  | 2025 | 1.032639 | 1 |
| 2081   | NF1      | Nf1       | 457  | 18  | 12444 | 6.82 | 8.68  | 7.75    | 2839 | 1.014085 | 1 |
| 9550   | AAK1     | Aak1      | 220  | 11  | 21283 | 0.79 | 1.34  | 1.065   | 961  | 0.994126 | 1 |
| 4288   | FBXO41   | Fbxo41    | 194  | 17  | 6939  | 7.5  | 7.17  | 7.335   | 875  | 0.980675 | 1 |
| 10128  | DGKZ     | Dgkz      | 439  | 15  | 4094  | 4.11 | 6.56  | 5.335   | 1303 | 0.978155 | 1 |
| 85002  | ARID1A   | Arid1a    | 316  | 16  | 8585  | 6.92 | 5.96  | 6.44    | 2285 | 0.973236 | 1 |
| 6310   | BMPR2    | Bmpr2     | 261  | 11  | 12086 | 1.39 | 1.31  | 1.35    | 1038 | 0.969163 | 1 |
| 375035 | PPP1R9B  | Ppp1r9b   | 534  | 21  | 4071  | 13.3 | 10.81 | 12.07   | 817  | 0.951518 | 1 |
| 3012   | KIAA1109 | 4932438A1 | 361  | 12  | 15592 | 2.72 | 2.83  | 2.775   | 5005 | 0.939335 | 1 |
| 1822   | CLCN3    | Clcn3     | 359  | 15  | 4058  | 4.26 | 7.74  | 6       | 866  | 0.9375   | 1 |
| 79573  | ATP13A2  | Atp13a2   | 284  | 15  | 3996  | 5.02 | 7.27  | 6.145   | 1180 | 0.92908  | 1 |
| 1181   | ARHGEF11 | Arhgef11  | 308  | 14  | 6904  | 4.9  | 5.84  | 5.37    | 1696 | 0.910865 | 1 |
| 9400   | BAI2     | Bai2      | 178  | 10  | 5434  | 1.18 | 0.87  | 1.025   | 1693 | 0.907029 | 1 |
| 51142  | AGRN     | Agrn      | 1020 | 61  | 7319  | 67.4 | 47.22 | 57.31   | 2045 | 0.906255 | 1 |
| 55275  | DIDO1    | Dido1     | 455  | 17  | 8592  | 9.04 | 8.5   | 8.77    | 2240 | 0.905701 | 1 |
| 11196  | AFF4     | Aff4      | 483  | 18  | 9580  | 9.29 | 10.54 | 9.915   | 1163 | 0.903841 | 1 |
| 7378   | LRRc8B   | Lrrc8b    | 150  | 10  | 7823  | 1.02 | 1.2   | 1.11    | 803  | 0.90009  | 1 |
| 25836  | CLTC     | Cltc      | 1286 | 53  | 8575  | 39   | 59.51 | 49.235  | 1675 | 0.894741 | 1 |

|        |          |           |      |    |       |      |       |        |      |          |   |
|--------|----------|-----------|------|----|-------|------|-------|--------|------|----------|---|
| 10319  | ADARB1   | Adarb1    | 527  | 23 | 7044  | 19.9 | 11.81 | 15.855 | 845  | 0.889576 | 1 |
| 3837   | KIAA0090 | C230096C1 | 481  | 26 | 4253  | 15.2 | 23.31 | 19.245 | 993  | 0.889041 | 1 |
| 8370   | MYO18A   | Myo18a    | 306  | 18 | 7591  | 11.5 | 9.21  | 10.35  | 2054 | 0.884521 | 1 |
| 9019   | SPTAN1   | Spna2     | 1513 | 51 | 7907  | 47.3 | 48.23 | 47.785 | 2477 | 0.882582 | 1 |
| 9528   | BCR      | Bcr       | 333  | 16 | 6927  | 8.1  | 8.17  | 8.135  | 1271 | 0.882272 | 1 |
| 6744   | ARHGEF12 | Arhgef12  | 491  | 16 | 9501  | 8.31 | 8.15  | 8.23   | 1544 | 0.877674 | 1 |
| 24148  | NAV2     | Nav2      | 243  | 11 | 11020 | 2.59 | 2.54  | 2.565  | 2432 | 0.875448 | 1 |
| 10813  | CDC42BPA | Cdc42bpa  | 222  | 12 | 10527 | 3.61 | 4.1   | 3.855  | 1719 | 0.866113 | 1 |
| 79813  | VPS13D   | Vps13d    | 163  | 12 | 16341 | 4.45 | 3.26  | 3.855  | 4388 | 0.866113 | 1 |
| 991    | MGAT5B   | Mgat5b    | 309  | 10 | 4246  | 1.5  | 1.63  | 1.565  | 918  | 0.864678 | 1 |
| 60312  | ATG9A    | Atg9a     | 775  | 29 | 3795  | 25   | 22.42 | 23.695 | 839  | 0.860662 | 1 |
| 84864  | DICER1   | Dicer1    | 324  | 13 | 10323 | 5.53 | 5.31  | 5.42   | 1922 | 0.843061 | 1 |
| 54935  | MYST3    | Myst3     | 255  | 14 | 9285  | 6.13 | 7.12  | 6.625  | 2004 | 0.842105 | 1 |
| 3988   | SON      | Son       | 825  | 32 | 8412  | 22.4 | 34    | 28.18  | 2426 | 0.838135 | 1 |
| 23401  | HCN2     | Hcn2      | 210  | 13 | 3459  | 6.75 | 4.53  | 5.64   | 1135 | 0.831202 | 1 |
| 10783  | FBXL19   | Fbxl19    | 203  | 12 | 3814  | 4.34 | 4.56  | 4.45   | 694  | 0.83045  | 1 |
| 3074   | TCF20    | Tcf20     | 329  | 12 | 7407  | 4.5  | 4.54  | 4.52   | 1960 | 0.826446 | 1 |
| 374986 | USP22    | Usp22     | 913  | 39 | 5220  | 32.1 | 42.5  | 37.285 | 525  | 0.824786 | 1 |
| 2022   | KIAA0664 | 1300001I0 | 763  | 38 | 5252  | 38   | 34.21 | 36.08  | 1309 | 0.824653 | 1 |
| 3399   | GBF1     | Gbf1      | 442  | 18 | 6376  | 10.6 | 13.42 | 12     | 1859 | 0.818182 | 1 |
| 58517  | CHD6     | Chd6      | 244  | 13 | 10389 | 6.34 | 5.78  | 6.06   | 2715 | 0.809465 | 1 |
| 8879   | MYCBP2   | Mycbp2    | 422  | 12 | 15025 | 4.31 | 5.35  | 4.83   | 4678 | 0.809171 | 1 |
| 10560  | ZFP106   | Zfp106    | 351  | 20 | 10487 | 14.8 | 14.72 | 14.775 | 1883 | 0.807265 | 1 |
| 5033   | UBE3C    | Ube3c     | 372  | 16 | 5195  | 9.71 | 10.43 | 10.07  | 1083 | 0.79721  | 1 |
| 54552  | DAB2IP   | Dab2ip    | 187  | 13 | 5472  | 7.14 | 5.56  | 6.35   | 1132 | 0.795107 | 1 |
| 55849  | PTCH1    | Ptch1     | 219  | 10 | 8065  | 2.75 | 2.48  | 2.615  | 1381 | 0.792707 | 1 |
| 57648  | PHF20    | Phf20     | 478  | 18 | 5899  | 13.7 | 11.82 | 12.755 | 1012 | 0.791035 | 1 |
| 1652   | COBL     | Cobl      | 284  | 11 | 5326  | 4.57 | 3.31  | 3.94   | 1261 | 0.789096 | 1 |
| 51293  | RTN4     | Rtn4      | 668  | 27 | 4871  | 21.3 | 28.44 | 24.855 | 1192 | 0.774638 | 1 |
| 54443  | AP3D1    | Ap3d1     | 504  | 22 | 4863  | 18.8 | 18.47 | 18.615 | 1153 | 0.768828 | 1 |
| 84516  | DIP2B    | Dip2b     | 347  | 13 | 8715  | 6.61 | 7.77  | 7.19   | 1576 | 0.756254 | 1 |
| 5046   | TRAK2    | Trak2     | 304  | 10 | 6527  | 2.78 | 3.86  | 3.32   | 914  | 0.750751 | 1 |
| 254065 | NUP98    | Nup98     | 501  | 23 | 6980  | 18.3 | 23.04 | 20.67  | 1800 | 0.749918 | 1 |
| 23317  | WWC1     | Wwc1      | 295  | 16 | 6753  | 12.7 | 10.46 | 11.59  | 1119 | 0.741084 | 1 |
| 55784  | DLG5     | Dlg5      | 502  | 21 | 7493  | 20.7 | 16.14 | 18.44  | 1919 | 0.738397 | 1 |
| 9639   | ARID1B   | Arid1b    | 335  | 11 | 9648  | 5.29 | 5     | 5.145  | 2249 | 0.726312 | 1 |
| 1432   | CDC42BPB | Cdc42bpb  | 446  | 25 | 6701  | 26.1 | 22.9  | 24.52  | 1711 | 0.724218 | 1 |
| 8722   | UBE2O    | Ube2o     | 243  | 17 | 5395  | 12.8 | 14.22 | 13.485 | 1292 | 0.723866 | 1 |
| 93183  | RERE     | Rere      | 317  | 12 | 8207  | 6.12 | 7.43  | 6.775  | 1566 | 0.71535  | 1 |
| 27242  | AP2A2    | Ap2a2     | 210  | 13 | 4616  | 8.72 | 7.89  | 8.305  | 939  | 0.710188 | 1 |
| 445815 | BAT3     | Bat3      | 397  | 22 | 3832  | 20.7 | 21.34 | 21     | 1234 | 0.709677 | 1 |
| 84172  | MAST2    | Mast2     | 254  | 14 | 5756  | 10.6 | 8.86  | 9.75   | 1798 | 0.708861 | 1 |
| 80308  | CLASP1   | Clasp1    | 176  | 10 | 8118  | 3.75 | 4.6   | 4.175  | 1650 | 0.705467 | 1 |
| 64924  | BRD4     | Brd4      | 468  | 21 | 5198  | 20.1 | 19.56 | 19.835 | 1362 | 0.703871 | 1 |
| 57505  | HIVEP2   | Hivep2    | 259  | 10 | 9732  | 4.96 | 3.59  | 4.275  | 2531 | 0.700525 | 1 |
| 26577  | GTF3C1   | Gtf3c1    | 352  | 15 | 7124  | 9.24 | 13.62 | 11.43  | 2352 | 0.699953 | 1 |
| 26020  | CLSTN1   | Clstn1    | 579  | 30 | 5209  | 32.8 | 32.98 | 32.875 | 1056 | 0.699708 | 1 |

|        |          |           |      |    |       |      |       |        |      |          |   |
|--------|----------|-----------|------|----|-------|------|-------|--------|------|----------|---|
| 7343   | ACO2     | Aco2      | 528  | 20 | 2744  | 15.4 | 22.11 | 18.735 | 780  | 0.696015 | 1 |
| 253725 | CBX6     | Cbx6      | 181  | 11 | 3284  | 5.92 | 5.76  | 5.84   | 412  | 0.694444 | 1 |
| 4800   | AHDC1    | Ahdc1     | 241  | 10 | 6512  | 4.36 | 4.6   | 4.48   | 1703 | 0.690608 | 1 |
| 10945  | BPTF     | Bptf      | 302  | 13 | 10914 | 7.94 | 9.71  | 8.825  | 2920 | 0.690571 | 1 |
| 3460   | TMEM63B  | Tmem63b   | 284  | 16 | 3215  | 12.2 | 14.34 | 13.265 | 832  | 0.687728 | 1 |
| 6448   | DHX30    | Dhx30     | 586  | 22 | 4133  | 19.4 | 25.18 | 22.28  | 1155 | 0.681537 | 1 |
| 2175   | CAMSAP1L | Camsap1l1 | 252  | 13 | 7359  | 6.87 | 11.31 | 9.09   | 1478 | 0.680985 | 1 |
| 9507   | ANKRD17  | Ankrd17   | 214  | 14 | 9390  | 9.77 | 11.45 | 10.61  | 2603 | 0.679282 | 1 |
| 51043  | ACLY     | Acly      | 453  | 29 | 4450  | 26.7 | 40.05 | 33.375 | 1101 | 0.668588 | 1 |
| 3146   | DIP2A    | Dip2a     | 346  | 14 | 7290  | 13.4 | 8.57  | 10.995 | 1571 | 0.666825 | 1 |
| 643314 | CTNNB1   | Ctnnb1    | 1164 | 44 | 3720  | 50.5 | 63.66 | 57.07  | 781  | 0.656031 | 1 |
| 23332  | KIAA0284 | AW555464  | 203  | 12 | 6681  | 9.01 | 8.25  | 8.63   | 1554 | 0.644122 | 1 |
| 7707   | USP32    | Usp32     | 300  | 11 | 7026  | 6.95 | 7.21  | 7.08   | 1604 | 0.644028 | 1 |
| 221002 | RUSC2    | Rusc2     | 227  | 10 | 5636  | 5.99 | 5.32  | 5.655  | 1516 | 0.638774 | 1 |
| 85464  | SAMD4B   | Samd4b    | 177  | 18 | 4543  | 16.3 | 20.57 | 18.425 | 694  | 0.633245 | 1 |
| 5445   | SBF1     | Sbf1      | 193  | 14 | 8033  | 12.2 | 12.92 | 12.555 | 1893 | 0.620705 | 1 |
| 6926   | CAMTA2   | Camta2    | 256  | 10 | 4852  | 5.95 | 6.35  | 6.15   | 1241 | 0.619195 | 1 |
| 1104   | MAP7D1   | Mtap7d1   | 154  | 12 | 3357  | 7.56 | 12.1  | 9.83   | 841  | 0.605144 | 1 |
| 649    | YWHAG    | Ywhag     | 881  | 27 | 3779  | 27.1 | 42.31 | 34.685 | 247  | 0.60423  | 1 |
| 5138   | MAP4     | Mtap4     | 577  | 20 | 6337  | 23   | 23.27 | 23.155 | 1152 | 0.603227 | 1 |
| 23221  | ARHGAP23 | 4933428G  | 154  | 10 | 6276  | 5.21 | 8     | 6.605  | 1476 | 0.602228 | 1 |
| 57418  | PHF12    | Phf12     | 188  | 10 | 4475  | 7.7  | 7.68  | 7.69   | 1004 | 0.565291 | 1 |
| 653489 | SUPT6H   | Supt6h    | 527  | 20 | 5896  | 23.5 | 27.35 | 25.445 | 1726 | 0.564254 | 1 |
| 332    | NFIC     | Nfic      | 500  | 15 | 2401  | 19.7 | 13.74 | 16.72  | 499  | 0.561377 | 1 |
| 5358   | MAP4K4   | Map4k4    | 267  | 12 | 7495  | 9.88 | 13.34 | 11.61  | 1320 | 0.555298 | 1 |
| 5902   | PIGQ     | Pigq      | 183  | 12 | 2921  | 12   | 11.27 | 11.64  | 780  | 0.554529 | 1 |
| 8570   | CIC      | Cic       | 180  | 11 | 5473  | 10.5 | 9.25  | 9.87   | 1608 | 0.553598 | 1 |
| 8355   | CNP      | Cnp       | 218  | 12 | 5222  | 12.1 | 12.08 | 12.075 | 421  | 0.543601 | 1 |
| 20     | AP1B1    | Ap1b1     | 229  | 11 | 4194  | 7.39 | 13.43 | 10.41  | 949  | 0.538951 | 1 |
| 51322  | PUM1     | Pum1      | 459  | 16 | 5416  | 20.2 | 19.55 | 19.895 | 1188 | 0.535207 | 1 |
| 1892   | ADD1     | Add1      | 170  | 10 | 4068  | 7.65 | 9.75  | 8.7    | 779  | 0.534759 | 1 |
| 55206  | CIT      | Cit       | 266  | 12 | 8576  | 14.7 | 10.37 | 12.525 | 2027 | 0.532741 | 1 |
| 1675   | EIF2C2   | Eif2c2    | 160  | 13 | 3520  | 14.5 | 14.5  | 14.5   | 859  | 0.530612 | 1 |
| 55568  | XPO6     | Xpo6      | 831  | 23 | 4422  | 28.1 | 38.76 | 33.42  | 1296 | 0.52971  | 1 |
| 85377  | DCTN1    | Dctn1     | 549  | 19 | 4518  | 21.9 | 30.04 | 25.98  | 1278 | 0.528071 | 1 |
| 80012  | IRS2     | Irs2      | 198  | 16 | 7014  | 23.6 | 17.59 | 20.615 | 1338 | 0.52262  | 1 |
| 23536  | NCOA6    | Ncoa6     | 194  | 10 | 7062  | 8.4  | 11.01 | 9.705  | 2063 | 0.507485 | 1 |
| 56910  | PDE2A    | Pde2a     | 658  | 27 | 4327  | 31.2 | 55.41 | 43.32  | 941  | 0.506377 | 1 |
| 79139  | PLD3     | Pld3      | 528  | 27 | 2424  | 49.6 | 40.3  | 44.925 | 490  | 0.491579 | 1 |
| 23052  | CAMSAP1  | Camsap1   | 290  | 12 | 7650  | 14.1 | 14.77 | 14.435 | 1602 | 0.491099 | 1 |
| 55127  | RHOB     | Rhob      | 910  | 47 | 2384  | 61.1 | 116.4 | 88.755 | 196  | 0.475925 | 1 |
| 9922   | PTPN11   | Ptpn11    | 526  | 16 | 6300  | 18.5 | 29.17 | 23.835 | 593  | 0.472883 | 1 |
| 137964 | ATN1     | Atn1      | 479  | 24 | 4367  | 44.7 | 39.68 | 42.185 | 1190 | 0.459902 | 1 |
| 9197   | ZFR      | Zfr       | 447  | 17 | 4746  | 24.9 | 29.11 | 26.995 | 1074 | 0.459522 | 1 |
| 5833   | SYMPK    | Sympk     | 174  | 12 | 4188  | 14.3 | 18.33 | 16.315 | 1274 | 0.456014 | 1 |
| 53838  | DOT1L    | Dot1l     | 198  | 10 | 7455  | 13.7 | 10.36 | 12.01  | 1537 | 0.454339 | 1 |
| 4241   | GIT1     | Git1      | 408  | 16 | 3778  | 26.2 | 26.36 | 26.27  | 770  | 0.441136 | 1 |



|       |          |          |      |     |      |      |       |         |      |          |   |
|-------|----------|----------|------|-----|------|------|-------|---------|------|----------|---|
| 3688  | APP      | App      | 3007 | 87  | 3648 | 194  | 184.1 | 188.875 | 770  | 0.437461 | 1 |
| 2873  | MADD     | Madd     | 204  | 12  | 6031 | 18   | 17.03 | 17.49   | 1647 | 0.436522 | 1 |
| 8501  | CAND1    | Cand1    | 414  | 14  | 5956 | 21.3 | 24.57 | 22.955  | 1230 | 0.424822 | 1 |
| 3480  | PSAP     | Psap     | 7598 | 179 | 2848 | 432  | 391.5 | 411.685 | 527  | 0.424487 | 1 |
| 25987 | CKAP5    | Ckap5    | 496  | 20  | 6714 | 32.4 | 42.93 | 37.67   | 2032 | 0.419551 | 1 |
| 79850 | ZC3H7B   | Zc3h7b   | 137  | 10  | 5868 | 14.5 | 13.19 | 13.84   | 977  | 0.419463 | 1 |
| 29894 | PTK2     | Ptk2     | 361  | 13  | 4453 | 18.8 | 23.28 | 21.04   | 1052 | 0.418814 | 1 |
| 80856 | SLC25A23 | Slc25a23 | 192  | 10  | 3475 | 14.2 | 13.81 | 14.02   | 468  | 0.41632  | 1 |

Legend. The top Top3 $\beta$ -bound mRNAs identified by HITS-CLIP that match the targets of FMRP.

Column abbreviations are:

mRNA\_len = Length of mRNA, nucleotides

ORF\_len,aa = Length of open reading frame, amino acids

RNA-seq rep1 (GSM591682) = RNA-seq, GEO acc# GSM591682, reads per 1 Kt

RNA-seq rep2 (GSM591659) = RNA-seq, GEO acc# GSM591659, reads per 1 Kt

Average RNA-seq = average of two replications of RNA-seq

Ntags (Top3b CLIP) = Number of Top3b CLIP tags mapped to mRNA

Ratio 1 = ratio of Top3b-Npeaks/(RNAseq+10)

The FMRP HITS-CLIP data are from Darnell et al. Cell. 2011

Binding (1) to FMRP is indicated.

The complete list is available upon request.

The raw Top3 $\beta$  HITS-CLIP data have been deposited at GEO (accession number GSE47502)

**Supplementary Table 4. Top 30 gene ontology (GO) terms enriched in common target transcripts of Top3 $\beta$  and FMRP**

| Molecular function                                   | (-LOG(p-value)) | Categories         | Genes                                                                                                                                                 |
|------------------------------------------------------|-----------------|--------------------|-------------------------------------------------------------------------------------------------------------------------------------------------------|
| histone acetyltransferase complex                    | 20              | Cell component     | Trrap,Ep300,Crebbp                                                                                                                                    |
| establishment of nucleus localization                | 20              | Biological Process | Myh10,Cdc42bpa,Ptk2                                                                                                                                   |
| microtubule binding                                  | 20              | Molecular function | Macf1,Dst,Apc,Nf1,Vps41,Kif1b,Clasp1,Mast2                                                                                                            |
| transcription factor binding                         | 20              | Molecular function | Nsd1,Trrap,Spen,Arnt2,Ep300,Chd4,Crebbp,Hcfc1,Atf7ip,Bptf,Dip2a,Hipk1,Ctnnb1,Nrip1,Ncor2,Arid2,Ncoa6                                                  |
| chromatin modification                               | 14.95           | Biological Process | Ncor1,Mll3,Mll1,Nsd1,Trrap,Ash1l,Ep400,Chd4,Crebbp,Hdac4,Rere,Myst3,Bptf,Ehmt2,Npcd,Cbx6,Nptxr                                                        |
| tubulin binding                                      | 14.61           | Molecular function | Macf1,Dst,Apc,Nf1,Vps41,Kif1b,Clasp1,Mast2                                                                                                            |
| embryonic development                                | 13.49           | Biological Process | Celsr2,Mll2,Macf1,Plxnd1,Ndst1,Mll1,Nsd1,Shank3,Myh10,Arnt2,Ep300,Bmpr2,Nf1,Grlf1,Cobl,Dicer1,Ptch1,Ski,Mib1,Myst3,Kif1b,Ctnnb1,Ncor2,Chd8,Gnas,Ncoa6 |
| stem cell development                                | 12.84           | Biological Process | Apc,Dicer1,Myst3                                                                                                                                      |
| nucleus localization                                 | 12.84           | Biological Process | Myh10,Cdc42bpa,Ptk2                                                                                                                                   |
| axon cargo transport                                 | 12.84           | Biological Process | Dst,Kif1b,App                                                                                                                                         |
| stem cell maintenance                                | 12.84           | Biological Process | Apc,Dicer1,Myst3                                                                                                                                      |
| lysine N-methyltransferase activity                  | 12.26           | Molecular function | Mll3,Nsd1,Ash1l,Ehmt2                                                                                                                                 |
| histone-lysine N-methyltransferase activity          | 12.26           | Molecular function | Mll3,Nsd1,Ash1l,Ehmt2                                                                                                                                 |
| protein-lysine N-methyltransferase activity          | 12.26           | Molecular function | Mll3,Nsd1,Ash1l,Ehmt2                                                                                                                                 |
| establishment and/or maintenance of chromatin archit | 12.24           | Biological Process | Ncor1,Mll3,Mll1,Nsd1,Trrap,Ash1l,Ep400,Chd4,Crebbp,Hdac4,Arid1a,Rere,Chd3,Chd6,Myst3,Bptf,Ehmt2,Npcd,Cbx6,Nptxr                                       |
| Rho guanyl-nucleotide exchange factor activity       | 12.09           | Molecular function | Trio,Arhgef17,Arhgef12,Arhgef11,Bcr,Arhgef7,Arhgef4                                                                                                   |
| regulation of synapse structure and activity         | 11.65           | Biological Process | Agrn,App,Ptk2                                                                                                                                         |

|                                                        |                          |                                                                                                                                                                                                                                                                                                             |
|--------------------------------------------------------|--------------------------|-------------------------------------------------------------------------------------------------------------------------------------------------------------------------------------------------------------------------------------------------------------------------------------------------------------|
| transcription cofactor activity                        | 11.62 Molecular function | Nsd1,Trrap,Spn,Ep300,Crebbp,Hcfc1,Atf7ip,Hipk1,Ctnnb1,Nrip1,Ncor2,Ncoa6                                                                                                                                                                                                                                     |
| post-translational protein modification                | 11.01 Biological Process | Lmtk2,Ptprj,Ptprs,Birc6,Ndst1,Wnk1,Hsn2,Mll1,Herc2,Nsd1,Ptprf,Spnb2,Mapk6,Mapk4,Tulp4,Sytl3,Trio,Usp34,Anapc1,Jak1,Herc1,Myebp2,Bmpr2,Huwe1,Aak1,Crebbp,Ppp1r9b,Ptch1,Cdc42bpa,Ube3c,Wnk2,Usp9x,Mib1,Usp22,Fbxl19,Taok1,Hipk1,Brd4,Ehmt2,Ptpn11,Mast2,Map4k4,Fbxo41,App,Cit,Cdc42bpb,Cand1,Ptk2,Nedd4,Ube2o |
| stem cell differentiation                              | 10.66 Biological Process | Apc,Dicer1,Myst3                                                                                                                                                                                                                                                                                            |
| coated pit                                             | 10.66 Cell component     | Lrp1,Cltc,Ap2a2,App,Sh3bp4                                                                                                                                                                                                                                                                                  |
| hormone receptor binding                               | 10.66 Molecular function | Nsd1,Ptpn11,Nrip1                                                                                                                                                                                                                                                                                           |
| regulation of cellular Cell component organization and | 10.47 Biological Process | Dst,Mll1,Myh10,Spnb2,Grlf1,Eif4g1,Spna2,Mib1,Rtn4,Mtap4,Clasp1,Agrn,Cit,Eif4g3,Ptk2                                                                                                                                                                                                                         |
| chromosome organization and biogenesis                 | 10.31 Biological Process | Ncor1,Mll3,Mll1,Nsd1,Trrap,Ash1l,Ep400,Chd4,Crebbp,Hdac4,Arid1a,Rere,Chd3,Chd6,Myst3,Bptf,Ehmt2,Npcd,Cbx6,Nptxr,Cit                                                                                                                                                                                         |
| Ras guanyl-nucleotide exchange factor activity         | 10.22 Molecular function | Trio,Arhgef17,Arhgef12,Arhgef11,Bcr,Arhgef7,Arhgef4                                                                                                                                                                                                                                                         |
| small GTPase regulator activity                        | 10.19 Molecular function | Trio,Arhgef17,Arhgef12,Arhgef11,Bcr,Cdc42bpa,Tbc1d9,Map4k4,Arhgef7,Cit,Cdc42bpb,Arhgef4,Git1                                                                                                                                                                                                                |
| GTPase regulator activity                              | 10.18 Molecular function | Sipa1l2,Trio,Arhgap21,Arhgef17,Arhgef12,Nf1,Grif1,Arhgef11,Bcr,Cdc42bpa,Tbc1d9,Dab2ip,Map4k4,Arhgef7,Cit,Cdc42bpb,Arhgef4,Git1                                                                                                                                                                              |
| morphogenesis of embryonic epithelium                  | 10.02 Biological Process | Celsr2,Shank3,Grif1,Cobl,Ptch1,Mib1,Ctnnb1                                                                                                                                                                                                                                                                  |
| negative regulation of cellular Biological Process     | 9.96 Biological Process  | Ncor1,Birc6,Mll1,Nsd1,Spnb2,Lrp1,Spn,Apc,Atp1a1,Dpm1,Adnp,Nf1,Grif1,Dicer1,Rc3h1,Ptch1,Spna2,Hdac4,Sash1,Atf7ip,Mib1,Rtn4,Myst3,Bptf,Mtap4,Clasp1,Hipk1,Ctnnb1,Ehmt2,Ptpn11,Nrip1,Ncor2,Dab2ip,Cit,Hivep1,Ptk2                                                                                              |

---

Legend. The top 30 gene ontology (GO) terms that are enriched in 233 common targets of Top3b and FMRP. These 233 transcripts are from the top 1500 Top3b target transcripts which also match FMRP targets (Darnell et al. 2011). The highlighted categories may be related to FMRP function in neurons.

**Supplementary Table 5. List of Top3b-bound mRNAs that match either schizophrenia or autism related genes**

| Gene Symbol | Schizophrenia(ALL COMBINED) | Autism | FMRP binding (Darnell) | FMRPbinding (Ascano 2012, score>=500) | Gene Ontology (GO) Terms                             |
|-------------|-----------------------------|--------|------------------------|---------------------------------------|------------------------------------------------------|
| EP300       | 1                           | 1      | 1                      | 1                                     | axon extension                                       |
| C4B         | 1                           | 1      | 0                      | 0                                     |                                                      |
| JARID2      | 1                           | 1      | 0                      | 0                                     |                                                      |
| CTNNB1      | 1                           | 0      | 1                      | 1                                     | neuron migration;neuroblast proliferation            |
| NOTCH2      | 1                           | 0      | 0                      | 1                                     |                                                      |
| DGCR2       | 1                           | 0      | 1                      | 0                                     |                                                      |
| PLXNA2      | 1                           | 0      | 1                      | 0                                     | axon guidance;neural tube development                |
| ARHGEF11    | 1                           | 0      | 1                      | 0                                     | axon guidance                                        |
| RTN4        | 1                           | 0      | 1                      | 0                                     | axonal fasciculation;axon extension                  |
| TTL         | 1                           | 0      | 0                      | 1                                     | regulation of axon extension                         |
| RTN4R       | 1                           | 0      | 1                      | 0                                     | axonogenesis;regulation of axonogenesis              |
| NR3C1       | 1                           | 0      | 0                      | 1                                     | postsynaptic density;neuron apoptosis                |
| ARVCF       | 1                           | 0      | 1                      | 0                                     |                                                      |
| UHMK1       | 1                           | 0      | 0                      | 1                                     | axon;neuron projection development                   |
| <b>PTK2</b> | 1                           | 0      | 1                      | 0                                     | neuron migration;axon guidance,synapse formation     |
| YWHAE       | 1                           | 0      | 0                      | 0                                     | neuron migration                                     |
| TGFB1       | 1                           | 0      | 0                      | 0                                     | neuroblast proliferation;axon                        |
| DDR1        | 1                           | 0      | 0                      | 0                                     | regulation of cell growth                            |
| COMT        | 1                           | 0      | 0                      | 0                                     | synaptic transmission;neurotransmitter               |
| ZDHHC8      | 1                           | 0      | 0                      | 0                                     |                                                      |
| CFB         | 1                           | 0      | 0                      | 0                                     |                                                      |
| PAM         | 1                           | 0      | 0                      | 0                                     |                                                      |
| SYT11       | 1                           | 0      | 0                      | 0                                     | synaptic vesicle membrane                            |
| SHC1        | 1                           | 0      | 0                      | 0                                     | neurotrophin TRKA receptor binding;neuron projection |
| NUMBL       | 1                           | 0      | 0                      | 0                                     | neuroblast division in subventricular zone           |
| HR          | 1                           | 0      | 0                      | 0                                     |                                                      |
| ANKRD11     | 0                           | 1      | 1                      | 1                                     | multicellular organism growth                        |
| NSD1        | 0                           | 1      | 1                      | 1                                     |                                                      |
| EP400       | 0                           | 1      | 1                      | 1                                     |                                                      |
| HDAC4       | 0                           | 1      | 1                      | 1                                     | neuromuscular junction                               |
| CREBBP      | 0                           | 1      | 1                      | 1                                     |                                                      |
| NF1         | 0                           | 1      | 1                      | 1                                     | neuroblast proliferation;neural tube development     |
| AFF4        | 0                           | 1      | 1                      | 1                                     |                                                      |
| ARID1B      | 0                           | 1      | 1                      | 1                                     |                                                      |

|          |   |   |   |                                               |
|----------|---|---|---|-----------------------------------------------|
| APC      | 0 | 1 | 1 | 1 axonogenesis;neuronal cell body             |
| PTPN11   | 0 | 1 | 1 | 1 axon guidance                               |
| MET      | 0 | 1 | 0 | 1 neuron migration;axon guidance              |
| SHANK3   | 0 | 1 | 1 | 0 postsynaptic density;neuron differentiation |
| ARNT2    | 0 | 1 | 1 | 0                                             |
| CHD7     | 0 | 1 | 0 | 1                                             |
| NIPBL    | 0 | 1 | 0 | 1 brain development                           |
| POGZ     | 0 | 1 | 0 | 1                                             |
| RAI1     | 0 | 1 | 0 | 1                                             |
| ADARB1   | 0 | 1 | 1 | 0                                             |
| JMJD1C   | 0 | 1 | 0 | 1                                             |
| TSN      | 0 | 1 | 0 | 1                                             |
| DYRK1A   | 0 | 1 | 0 | 1                                             |
| RB1CC1   | 0 | 1 | 0 | 1                                             |
| UBE3A    | 0 | 1 | 0 | 1 brain development                           |
| XPO1     | 0 | 1 | 0 | 1                                             |
| ROBO1    | 0 | 1 | 0 | 0 axon guidance                               |
| CACNA1H  | 0 | 1 | 0 | 0 axon guidance                               |
| LAMB1    | 0 | 1 | 0 | 0 axon guidance;neuron projection development |
| GTF2I    | 0 | 1 | 0 | 0 neuronal cell body                          |
| LAMC3    | 0 | 1 | 0 | 0                                             |
| CDH10    | 0 | 1 | 0 | 0                                             |
| LAMA1    | 0 | 1 | 0 | 0 axon guidance                               |
| CD99L2   | 0 | 1 | 0 | 0                                             |
| SLC16A3  | 0 | 1 | 0 | 0                                             |
| EXT1     | 0 | 1 | 0 | 0 axon guidance                               |
| SLC30A5  | 0 | 1 | 0 | 0                                             |
| NFIA     | 0 | 1 | 0 | 0                                             |
| SPAST    | 0 | 1 | 0 | 0                                             |
| SLC39A11 | 0 | 1 | 0 | 0                                             |
| C3orf58  | 0 | 1 | 0 | 0                                             |
| MARK1    | 0 | 1 | 0 | 0 neuron migration                            |
| PITX1    | 0 | 1 | 0 | 0                                             |
| CMIP     | 0 | 1 | 0 | 0                                             |
| CASC4    | 0 | 1 | 0 | 0                                             |
| SATB2    | 0 | 1 | 0 | 0 neuron migration                            |
| YEATS2   | 0 | 1 | 0 | 0                                             |
| VPS13B   | 0 | 1 | 0 | 0                                             |
| SND1     | 0 | 1 | 0 | 0                                             |
| REEP3    | 0 | 1 | 0 | 0                                             |
| CLTCL1   | 0 | 1 | 0 | 0                                             |
| DCTN5    | 0 | 1 | 0 | 0                                             |

Legend. The top Top3b-bound mRNAs identified by HITS-CLIP that match either Schizophrenia or autism related genes. The matched genes are marked with "1", whereas those that do not match are marked with "0". The schizophrenia related genes are from a combined lists of genes reported by previous studies: The Schizophrenia Psychiatric Genome-Association Study (GWAS) Consortium, 2011; Sun et al. 2009; and Chandrasekaran and Bonchev; 2012. The autism spectrum disorder related genes are downloaded from website: [https://gene.sfari.org/autdb/HG\\_Home.do](https://gene.sfari.org/autdb/HG_Home.do).

**Supplementary Table 6. Oligos used in binding and topoisomerase assays.**

| DNA oligos | Sequence                                                                                                                                                                        |
|------------|---------------------------------------------------------------------------------------------------------------------------------------------------------------------------------|
| K128f      | ACTTCGAAATTAATACGACTCACTATAGGGAGATTTTTTTTTTTTTTTTTTTTTTTTGTTCAGACGGATC<br>TTTTTTTTTTTTTTTTTTTTTCTCCCGACTGGTTTTTTTTTTTTTTTTTTTTTGTATCCGTCTGACTTTT<br>TTTTTTTTTTTTTTTTTCCAGTC     |
| K128r      | GACTGGAAAAAAAAAAAAAAAAAAAAAAAAAGTCAGACGGATCAAAAAAAAAAAAAAAAAAAAA<br>CCAGTCGGGAGAAAAAAAAAAAAAAAAAAAAAAAAAGATCCGTCTGACAAAAAAAAAAAAAAAA<br>AAAAATCTCCCTATAGTGAGTCGTATTAATTTTCGAAGT |
| K128link   | GATCCGTCTGACAAAAAAAAAAAAAAAAAAAAATCTCCCGACTGGAAAAA                                                                                                                              |
| H1         | GTGACCGTCTCCGGGAGCTGGAAACGCGCGAGACGAAAGG                                                                                                                                        |
| H5         | CCTTTCGTCTCGCGCGTTTCCAGCTCCCGGAGACGGTCAC                                                                                                                                        |
| RNA oligos |                                                                                                                                                                                 |
| rH1        | GUGACCGUCUCCGGGAGCUGGAAACGCGCGAGACGAAAGG                                                                                                                                        |
| rH5        | CCUUUCGUCUCGCGCGUUUCCAGCUCCCGGAGACGGUCAC                                                                                                                                        |
| rA40       | AAAAA AAAAA AAAAA AAAAA AAAAA AAAAA AAAAA AAAAA                                                                                                                                 |
| rU40       | UUUUU UUUUU UUUUU UUUUU UUUUU UUUUU UUUUU UUUUU                                                                                                                                 |
| rC40       | CCCCC CCCCC CCCCC CCCCC CCCCC CCCCC CCCCC CCCCC                                                                                                                                 |
| rG40       | GGGGG GGGGG GGGGG GGGGG GGGGG GGGGG GGGGG GGGGG                                                                                                                                 |
